# Supplementary material
Source: PubMed Central journal article supplement (PMC8784963)

Supplementary Data

## **Clinical-Grade Stem Cell-Derived Retinal Pigment Epithelium Patch Rescues Retinal Degeneration in Rodents and Pigs**

Ruchi Sharma<sup>1#</sup>, Vladimir Khristov<sup>2#</sup>, Aaron Rising<sup>2#</sup>, Balendu Shekhar Jha<sup>1</sup>, Roba Dejene<sup>1</sup>, Nathan Hotaling<sup>1</sup>, Yichao Li<sup>3</sup>, Jonathan Stoddard<sup>4</sup>, Casey Stankewicz<sup>5</sup>, Qin Wan<sup>2</sup>, Connie Zhang<sup>2</sup>, Mercedes Maria Campos<sup>6</sup>, Kiyoharu J. Miyagishima<sup>2</sup>, David McGaughey<sup>7</sup>, Rafael Villasmil<sup>8</sup>, Mary Mattapallil<sup>9</sup>, Boris Stanzel<sup>10</sup>, Haohua Qian<sup>3</sup>, Wai Wong<sup>11</sup>, Lucas Chase<sup>5</sup>, Steve Charles<sup>12</sup>, Trevor McGill<sup>4</sup>, Sheldon Miller<sup>2</sup>, Arvydas Maminishkis<sup>2</sup>, Juan Amaral<sup>13</sup>, and Kapil Bharti<sup>1\*</sup>

1 Unit on Ocular and Stem Cell Translational Research, National Eye Institute, NIH, Bethesda, MD

2 Section on Epithelial and Retinal Physiology and Disease, National Eye Institute, NIH, Bethesda, MD

3 Visual Function Core, National Eye Institute, NIH, Bethesda, MD

4 Casey Eye Institute, Oregon Health & Science University, Portland, OR

5 Cellular Dynamics International, Inc. - A FUJIFILM Company - Madison, WI

6 Histology Core, National Eye Institute, NIH, Bethesda, MD

7 Ophthalmic Genetics and Visual Functional Branch, National Eye Institute, NIH, Bethesda, MD

8 Flow Cytometry Core, National Eye Institute, NIH, Bethesda, MD

9 Laboratory of Immunology, National Eye Institute, NIH, Bethesda, MD

10 Macula Center Saar, Sulzbach Knappschaft Eye Clinic, Sulzbach/ Saar, Germany

11 Unit on Neuron-Glia Interactions in Retinal Disease, National Eye Institute, NIH, Bethesda, MD

12 Founder, Charles Retina Institute, Germantown, TN 38138

13 Office of Scientific Director, National Eye Institute, NIH, Bethesda, MD

# Equal first

\*Corresponding Author - [Kapilbharti@nei.nih.gov](mailto:Kapilbharti@nei.nih.gov)

## **MATERIALS AND METHODS**

### **Research and clinical-grade iPSC derivation, maintenance, and RPE differentiation**

Reporter iPSC line expressing GFP under the control of TYROSINASE enhancer and constitutive RFP was previously published (54) and used to optimize the research-grade differentiation protocol. iPSCs were cultured on MEFs for 4 days before using for differentiation. To make cell aggregates, iPSCs were treated with Collagenase for 20 mins. After collagenase was aspirated, NEIM (DMEM/F12, KOSR, supplemented with N2, B27, LDN-193189 10uM, SB431452 10 nM, CKI-7 hydrochloride 0.5 uM, and IGF-1 1ng/ml) was added to the wells (1ml/well) and cell scarper was used to scrape the colonies. Cell aggregates were grown in 10 cm<sup>2</sup> low attachment corning dishes in NEIM medium for 48 hrs. After 48 hours, floating cell aggregates were collected and seeded in matrigel coated plates in RPEIM (DMEM/F12, KOSR, supplemented with N2, B27, LDN-193189 100uM, SB431452 100 nM, CKI-7 hydrochloride 5 uM, and IGF-1 10ng/ml, PD0325901 1uM) and cultured for 3 weeks. After 3 weeks in RPEIM, cells were moved to RPECM (DMEM/F12, KOSR, supplemented with N2, B27, Nicotinamide 10mM and Activin A 100ng/ml) for 3 more weeks with regular medium change. Pigmented patches of immature RPE cells were collected through differential trypsinization and seeded on to transwells or T-25 flasks in RPEGM (MEM, Sigma; 1% N2 supplement, ThermoFisher; 1% Glutamine, ThermoFisher; 1% non-essential amino acids, ThermoFisher; 125 mg Taurine (Sigma)/500 ml; 10 ug Hydrocortisone (Sigma)/500 ml; 0.0065 ug Triiodo-thyronin (Sigma)/500 ml; 5% FBS, Sigma) (32). Table S3 provides a list of all reagents used in the manufacturing process. Flow cytometry was performed to check GFP expression in the differentiating cells at various time points.

For clinical-grade protocol, feeder free iPSCs clones were derived from CD34<sup>+</sup> PBMC using a previously published report (17). Working banks of up to eight clones were validated for pluripotency by flow cytometry, sterility (WuXiApp Tech), normal G-band karyotyping (Cell Line Genetics), STR identity (Univ. Madison Clinics), plasmid loss (Cellular Dynamics Inc.), and oncogene sequencing (Q2 Solutions). iPSCs cells were then seeded on vitronectin (A14701S, ThermoFisher) coated surface in E8 Medium (A1517001, ThermoFisher). After 2 days, cells were transferred to RPEIM for 10 days and then

to RPECM for another 10 days. On day 22, cells were switched to RPEGM, trypsinized at day27 and reseeded in RPEGM. On day 42, cells were enriched using anti-CD24 and anti-CD56 antibodies and reseeded on to scaffolds in RPEMM (MEM, Sigma; 1% N2 supplement, ThermoFisher; 1% Glutamine, ThermoFisher; 1% non-essential amino acids, ThermoFisher; 125 mg Taurine (Sigma)/500 ml; 10 ug Hydrocortisone (Sigma)/500 ml; 0.0065 ug Triiodo-thyronin (Sigma)/500 ml; 5% FBS, Sigma; 50 uM PGE2, R&D Biosystems).

### **Real time PCR**

Total RNA was isolated using NucleoSpin RNA (#740955, Machery-Nagel) per manufacturer's protocol. RNA was quantified using an ND- 1000 spectrophotometer (Nanodrop Technologies). cDNA synthesis and custom made 24 RPE gene array plates were purchased from Bio-rad. Sybr green based Qpcr was run on ViiA 7 Real-Time PCR System (Thermo Fisher Scientific) according to manufacturer's protocol. Each sample were run in at least 3 biological replicate and data was analyzed in R-based software.

### **Trans Epithelial Resistance**

Electric intactness was measured using EVOM2 and EndOhm chamber (World Precision Instruments) and each clone was measured for its resistance for 3 biological replicates.

### **Hexagonality measurement methodology**

Cells were fixed in 4% paraformaldehyde and stained for Anti-Zonula Occluden-1 (ZO1) conjugated to AlexaFluor 594. Whole trans-wells were mounted and 2mm x 4mm x 60 micrometer sections of each well were imaged at 20x with a Zeiss Axio Scan-1. Z-stacks were then maximum-intensity projected (MIP) and cells in the MIP were analyzed for their borders in MATLAB. Once cell borders had been identified a binary "mask" was created to measure cell morphological properties. How close RPE were to an ideal convex regular hexagon was measured using a metric known as "Hexagonality". Briefly, Hexagonality was assessed by taking 10 times the average of two different ratios (Eq. 3). The two ratios

are the hexagon-side-ratio (HSR) as defined by Eq. 1 and the hexagon-area-ratio (HAR) as defined by Eq. 2.

$$\text{Eq. 1: } \frac{P_{Cell}}{P_{Hull}} * \left[ 1 - \left| 1 - \frac{P_{cell}}{6 * \sqrt{\frac{4 * A_{cell}}{6 * \cot(\frac{\pi}{6})}}} \right| \right] = HSR$$

$$\text{Eq. 2: } \frac{A_{Cell}}{A_{Hull}} * \left[ 1 - \left| 1 - \frac{4 * A_{cell}}{6 * \left(\frac{P_{cell}}{6}\right)^2 * \cot(\frac{\pi}{6})} \right| \right] = HAR$$

$$\text{Eq. 3: } 10 * \left( \frac{HSR + HAR}{2} \right) = \text{Hexagonality}$$

In the above  $P_{Cell}$  is the perimeter of the cell,  $P_{Hull}$  is the perimeter of the convex hull surrounding the cell,  $A_{Cell}$  is the area of the cell,  $A_{Hull}$  is the area of the convex hull.

### Phagocytosis of Photoreceptor Outer Segments

Phagocytic ability of iRPE cells was measured using a published protocol with slight modifications (55). Bovine photoreceptor outersegments (POS) (InVision Bio) were labeled with pH-rodo dye (ThermoFisher) as per manufacturer's protocol. Mature iRPE cells after 5 weeks of culture on transwells or PLGA scaffolds were fed at the concentration of 5 POS/iRPE cell for 4 hours at 37C. Cells were washed with DPBS 3 times and incubated in 0.25% trypsin for 20 minutes. Trypsinized cells were collected with 1 ml pipette and suspended in 15 ml tube containing 10 ml of RPE MM. 15 ml tubes with cells were centrifuged at the 400g for 5 minutes, the cell pellet was washed 3 times in 10 ml of DPBS, resuspended in 10 ml DPBS and the cell suspension was passed through a 0.44um cell strainer. Cells samples were run through MACS Miltenyi Flow Cytometer. Live cells were selected as DAPI negative. A laser channel with an excitation at 586 nm and emission at 515 nm was used to determine fluorescence from uptaken pH-rodo labelled POS. Flow cytometry data was analyzed with flowjo

software and the median fluorescence for channel Y1 positive population was calculated for the fed and unfed samples. The ratio of fed samples to unfed samples was calculated and plotted in a graph.

### **Lactic Acid Measurements**

PLGA scaffolds were incubated under the same conditions used for culturing of iPSC-RPE-patches. Culture medium was changed every alternate day and incubated medium was collected in a 15 ml tube. Media from three consecutive medium changes was combined in one tube. Same procedure was followed for all of the six technical replicates. Collected medium was immediately frozen and stored at -80 C. Lactic acid measurements were performed at the Certified NIH Clinical Center Clinical Chemistry lab. Since each technical replicate tube from three consecutive media collections contained 12 ml of medium, it was lyophilized to reduce the total volume. Lyophilized material was resuspended in 1 ml of 1x D-PBS. Lactic acid measurement was performed at the NIH Clinical Center General Chemistry lab using using a Lactate Gen. 2 machine with a measuring range of 0.2-15.5 mmol/L (1.8-140 mg/dL).

### **Oncogene Coding Variant Analysis**

Coding regions and near exonic positions across 223 oncogenes were deeply sequenced by Q<sup>2</sup> Solutions for each iPSC clone and accompany PBMC donor. Variants labeled as potentially deleterious were detected using Tute Genomics in the Q<sup>2</sup> provided variant call file (VCF). Additionally, we used three different somatic callers (Mutect version 1.15, SomaticSniper version 1.0.5.0; and Strelka version 1.0.15) to compare each iPSC clone to the matched PBMC. This parallel analysis found no new mutations in exon or splice positions. All sequences can be downloaded from dbGAP server (ID: SUB4785176).

### **Animals**

Castrated Yucatan minipigs (RRID: NSRRC\_0012) and Yorkshire pigs (age: 5-11 months ; weigh: 30-40 Kg), Crl:NIH-Foxn1<sup>tmu</sup> immunocompromised and Royal College of Surgeon rats were used. All animal studies were reviewed and approved by the NIH Animal Care and Use Committee. All animals were handled in accordance with the Association for Research in Vision and Ophthalmology (ARVO)

statement for the use of animals in Ophthalmic and Vision Research. All animals were fed according to the body weight.

## **Surgical Delivery of Cells in Rodents**

### *Suspension*

Post-natal day (P) 21-28, RCS rats (RRID: RGD\_1358258) or adult immunocompromised rats, Crl:NIH-*Foxn1*<sup>nu</sup> Nude rats (RRID # RGD\_2312499) were anesthetized with 2, 2, 2-Tribromoethanol (intraperitoneal; 230 mg/kg; Sigma) and eyes received topical 0.5% proparacaine HCl anesthesia. Pupils were dilated with 1% tropicamide and 2.5% phenylephrine HCl and the eye was slightly proptosed. A small scleral/choroidal incision (~1 mm) was made 2 mm posterior to the limbus in the dorso-temporal region using increasing gauge needle tips. A small lateral corneal puncture was made using a 30-gauge needle to limit increase of intraocular pressure and reduce efflux of cells following injection. Two microliters of suspension containing the total cell dose (100,000 cells) was delivered into the subretinal space of one eye using a fine glass pipette (internal diameter, 75–150  $\mu$ m) inserted into the subretinal space. The conjunctiva was then repositioned over the scleral incision. All animals included in the study received injection of cells with a minimum pre and post dose cell viability of 90%. All RCS rats received daily intraperitoneal injections of dexamethasone (1.6 mg/Kg) for 2 weeks post cell transplantation to minimize a potential inflammatory response.

### *iRPE-patch*

Placement of the iRPE-patch followed the same general procedure as with suspension injection with the following exceptions. Subretinal blebs were created using 2-3  $\mu$ l balanced salt solution (BSS+) and scleral incision was extended using an 18ga needle to accommodate insertion of a 1-mm round implant. Using a sterile trephine, a 1-mm punch of RPE-scaffold was extracted from the culture plate. Using ILM peel forceps, the 1-mm implant was grasped at the distal end to offer protection and stability to the scaffold during implantation. Forceps were gently inserted into the subretinal space in the orientation of RPE facing the photoreceptors.

### **Optokinetic Tracking**

Optokinetic tracking (OKT) thresholds were measured using a virtual optomotor system (VOS; CerebralMechanics) that allows evaluation of both the left and right eyes independently. Thresholds were evaluated at P90, using methods described elsewhere (39, 56). A single principle operator evaluated thresholds that were confirmed by a second operator.

### **Immunosuppression**

Tetracycline antibiotics Doxycycline and Minocycline are used orally in doses of 5mg/Kg twice a day. A loading intramuscular dose of methylprednisolone is used at doses of 5mg/Kg, followed by similar daily oral single doses of prednisone. Rapamycin is used orally with a loading dose of 2 mg, followed by a 1 mg daily dose. Tacrolimus is used in oral doses of 0.5 mg/day.

### **Laser-injury Model**

An IQ 532 micropulse laser (Iridex) with a TxCell scanning laser delivery device is used to selectively damage the RPE using a Volk HR centralis contact lens (Volk Optical Inc.) with 74° field of view, 1/08x magnification and laser spot magnification of 0.93x. Micropulse power sufficient to obtain a mild whitening of the lasered area (1000-1600 milliwatts), and exposure times of 330 milliseconds are used. With micropulse duty cycles of 1% (0.100 milliseconds pulse “on” and 9.900 milliseconds pulse “off”) and a spot size of 200 microns, 7x7 confluent grids are made to create a 49 mm<sup>2</sup> lesion.

### **Pig iRPE-patch Transplantation**

Sterilization of the surgical area with povidone iodine, a temporal canthotomy, superior rectus traction and nictitating membrane retraction is performed to increase the surgical exposure area. A nasal peritomy is done to expose sclera and 4 surgical ports (infusion, chandelier illumination, and 2 working ports) are created 3.5mm from limbus using 25G valve trocar cannulas (Alcon surgical). After vitrectomy and posterior vitreous detachment, a localized retinal detachment (RD) is done in the visual streak (laser area)

using a 25G/38G cannula (MedOne Surgical Inc.) and scissors retinotomy is done at the base of the RD. A sclerotomy (2.3-2.5 mm) is done in the area of the nasal port to accommodate the transplantation tool. Tip of the tool is introduced through the retinotomy into the subretinal space where the iRPE scaffold is released with the help of the viscous fluid injector device of the vitrectomy system (Alcon surgical). An ocular wound clamp (custom made) closes the sclerotomy to maintain the intraocular pressure while performing fluid air exchange to flatten the detached area which is confirmed by intraoperative OCT. The sclerotomy is closed with nylon 8-0.

### **Optical Coherence Tomography and Fluorescein Angiography**

After the animal is adequately anesthetized, a Jet-Electrode was placed on the eye with an appropriate amount of GenTeal Tears (Alcon). OCT was performed using Spectralis (Heidelberg Engineering) with a 55° degree lens. The region of interest (ROI) was placed in the center and both averaged single B-scan across ROI and volume OCT scans covers entire ROI was performed. Follow-up function of the instrument was used to allow for OCT scans at the same retinal location for each examine time point. Spectralis was also used for capturing fluorescein angiogram with intravenous injection of Sodium Fluorescein (SF, Akorn Inc, Lake Forest, IL). Early (first min) and late phase (15 min) angiograms were recorded.

### **Multi-focal Electroretinography**

mfERG was recorded using the RETImap system (Roland Consult). Briefly, a bipolar contact lens (The GoldLens Corneal Electrode) was placed on the eye. A ground electrode, Genuine Grass Platinum Subdermal Needle Electrode (Natus Manufacturing Limited) was placed under the skin of the chin of the animal. A minimum of 3 cycles were used for each recording and a total of 3 overlapping retinal regions were measured. In each recording the ROI was shifted slightly around the field of view to account for slight differences in optics. A low bandpass of 10hz and a high bandpass of 300hz was used. The 7 mfERG components determined from the MATLAB program are N1 (first major trough)



and P1 (the following peak) amplitudes (nV/deg<sup>2</sup>), N1P1 (difference between N1 and P1 amplitudes), Scalar Product, AUC, and widths of N1 and P1 (time in msec at half the max amplitude of peak). The 7 mfERG components are normalized by subtracting the laser signal of the implant with the healthy region signals and dividing by the pre-laser signal.

### **Immunostaining and Histology**

Tissue preparation for immunohistochemistry was done by placing the eye in 4% PFA for a maximum of 4 hours after enucleation. The surgery area was dissected out and placed in 10% sucrose/PBS overnight followed by 24 hours in 20% sucrose/PBS. The samples were then placed in a 2:1 OCT:20% Sucrose solution and flash frozen in a cryostat mold and placed in the -80 freezer until sectioning on the cryostat could be performed. Cryostat sectioning was done at 10µm sections with tissue section separated every 50 µm. Immunohistochemistry was performed in general as follows: 5% Natural Goat Serum (NGS) (Thermo Fisher Scientific) blocking solution for 2 hrs followed by primary antibody incubation overnight in 1% NHS at room temperature. Primary antibodies include: RPE65 (1:300, Abcam; ab78036, and custom antibody from M. Redmond lab/NEI 1:400), Biotinylated Peanut Agglutinin (PNA) (1:300, Vector Laboratories; B-1075), STEM121 (1:300 Takara Clontech; Y40410), STEM101 (1:300, Takara Clontech), Rhodopsin (1:10,00, Encor Biotechnology Inc.; MCA-B630); Red/Green Opsin (1:300 Millipore; AB5405); Blue Opsin (1:300 Millipore; AB5407); iPSCs - OCT4 (#653704, Biolegend, RRID: AB\_2562018), TRA 1-81 (#560124, BD Biosciences); and SSEA-4 (#560126, BD Biosciences); RPE progenitors - MITF (#X2397M, Exalpa), PAX6 (#PRB-278P, Covance); committed RPE - PMEL17 (#HMB45, Dako), TYRP1 (#NBP2-32901, Novus Biologicals), and mature RPE - BEST1 (#NB300-164, Novus Biologicals). Ezrin (#E8897, SigmaAldrich), Collagen IV (#ab6311, Abcam), ALDH1A3 (#ab80176, Santa Cruz Biotechnology). Following

overnight incubation, the tissue samples were washed 3x in 1% NGS solution and secondary antibodies conjugated to fluorescent markers, Alexa 488, Alexa 555 and or Alexa 633 (Thermo Fisher Scientific), to the appropriate primary in 1% NGS solution at 1:300 dilution. The slides were then either imaged on the Zeiss 800 confocal microscope or the Zeiss Axio Scan. Z1 slide scanner. The number of nuclei (DAPI) in the implant region (either empty scaffold or iRPE-Patch) was normalized to the corresponding healthy region on the same section. The same distance across the retina (~ 400  $\mu\text{m}$ ) was used for the implant area and the corresponding healthy area to count.

**A Research-grade triphasic RPE differentiation protocol (107 days)**

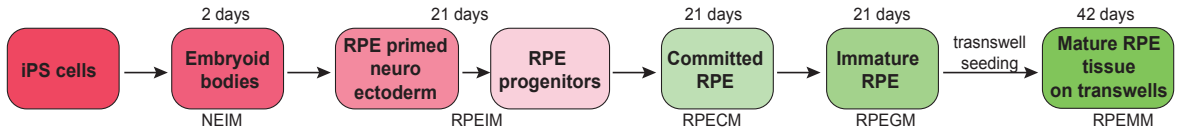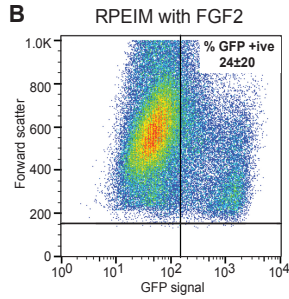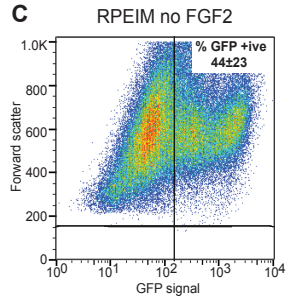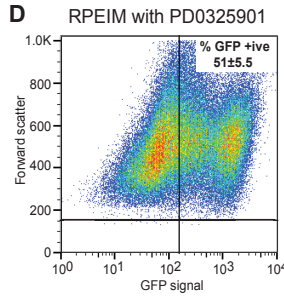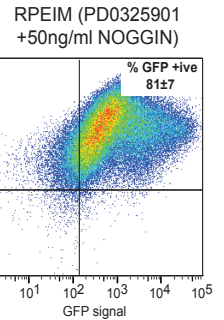

**F Percent GFP positive cells in RPECM with:**

|                                       |          |
|---------------------------------------|----------|
| ACTIVIN A - (A)                       | 69 ± 16  |
| Nicotinamide +ACTIVIN A - (NA)        | 81 ± 7   |
| WNT3a (W)                             | 83 ± 8.5 |
| Nicotinamide + ACTIVIN A + WNT3 (NAW) | 82 ± 10  |

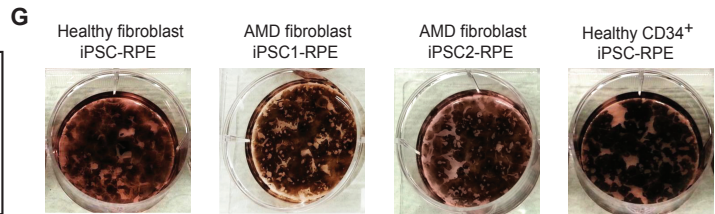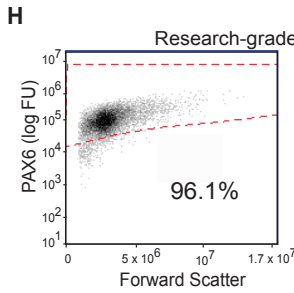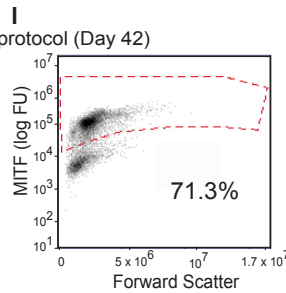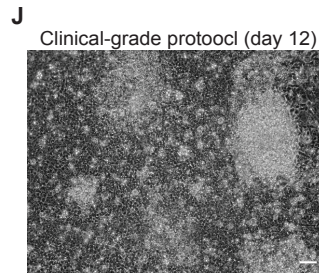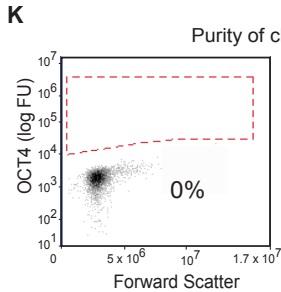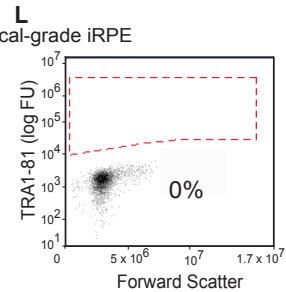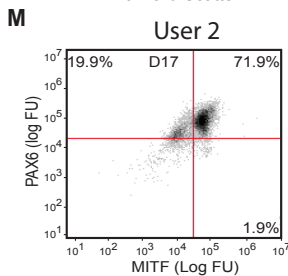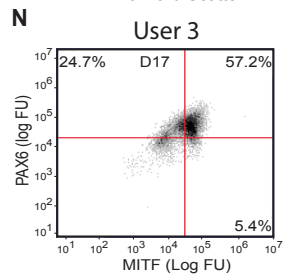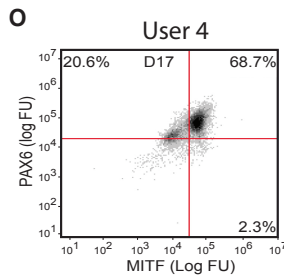

**Fig. S1. Optimization of iPSC-RPE differentiation.** (A) Time-line for research-grade iPSC-RPE differentiation. Differentiation into mature RPE takes 107 days and is initiated using 3D iPSC aggregates in NeuroEctoderm Induction Medium (NEIM). (B, C) Expression of RPE-specific GFP in iPSCs differentiated in the presence of FGF2 (B) or without FGF2 (C). GFP expression is measured using a reporter iPSC line expressing GFP under the control of TYROSINASE gene promoter<sup>42</sup>. (D) iPSC-RPE differentiation in the presence of MEK inhibitor (PD0325901) in RPEIM. (E) iPSC-RPE differentiation in using DUAL SMAD-inhibition with low amounts of NOGGIN (50ng/ml) in RPEIM combined with ACTIVIN A (100ng/ml) in RPE Commitment Medium (RPECM). (F) ACTIVIN A and WNT3a in RPECM do not show any synergistic increase in number of GFP-positive RPE progenitors, as shown recently<sup>15</sup> (n=3). (G) Reproducible maturation of RPE derived using a research-grade differentiation protocol from healthy and patient iPSC lines (fibroblasts or blood derived) (n=4). (H, I) Flow cytometry analysis of PAX6 and MITF positive RPE cells at D42 of research-grade differentiation protocol. (J) Epithelial phenotype in cells on D12 of clinical-grade differentiation protocol. (K, L) Flow cytometry analysis of OCT4 and TRA1-81 at D42 of clinical-grade iPSC differentiation protocol confirms the absence of iPSCs. (M-O) Three additional users (first user data in Fig. 1D) reproduced the clinical-grade iPSC differentiation protocol, shown by flow cytometry analysis of PAX6 and MITF double positive cells at D17.

*In vitro* degradation of PLGA scaffolds - side view

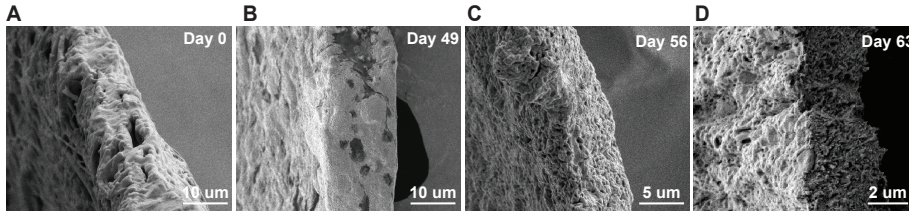

*In vitro* degradation of PLGA scaffolds - top view

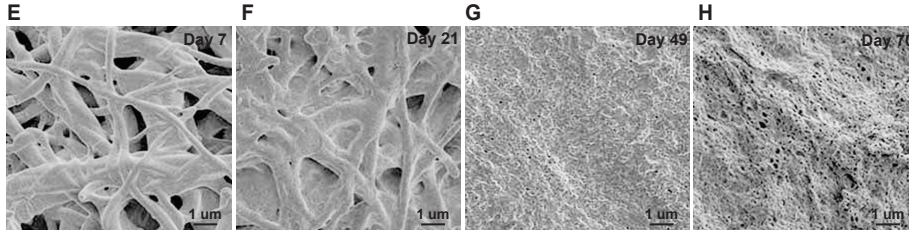

**Fig. S2. Degradation Kinetics of PLGA Scaffold.** (A-H) SEM images of PLGA scaffold from an edge (A-D) and *en face* (E-H) views during degradation, showing changes in surface topology and thinning of the entire scaffold due to bulk degradation of PLGA fibers.

Supplementary Figure 3

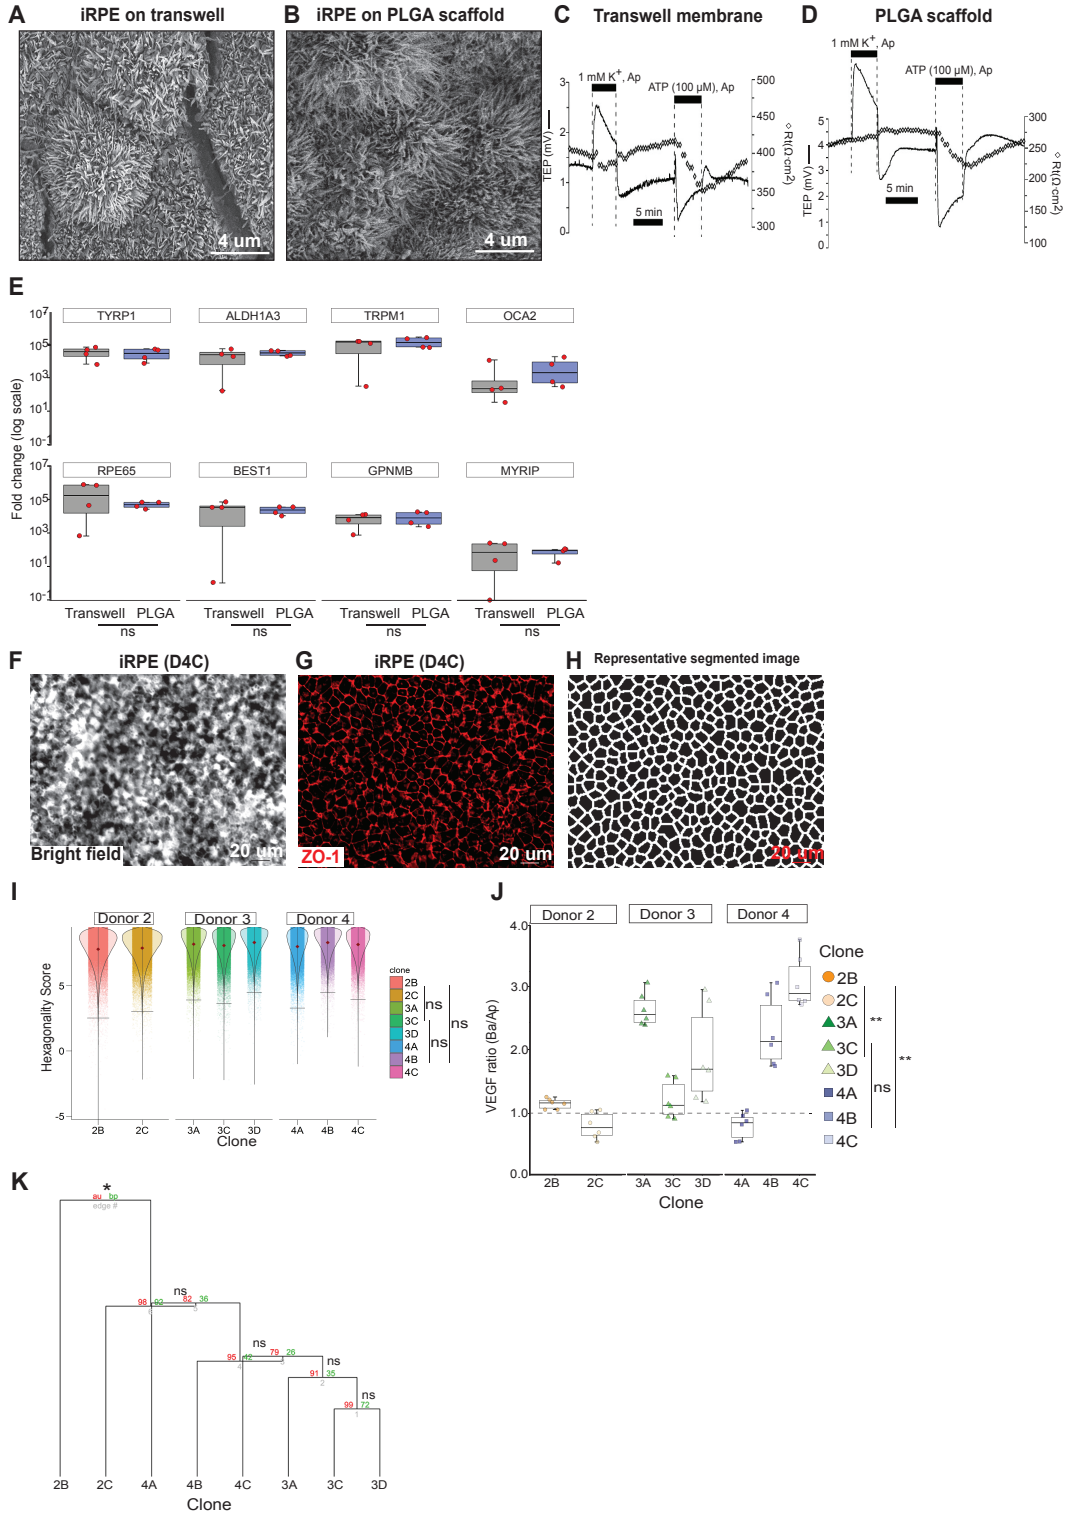

**Fig. S3. Evaluation of functionally mature iRPE patch.** (A, B) SEM confirms the presence of comparable apical processes on PLGA-iRPE-patch and transwell-iRPE-patch. (C, D) Electrophysiological traces confirm similar electrical properties of the PLGA-iRPE-patch and transwell-iRPE-patch. (E) Comparison of fold change in RPE-specific genes between PLGA-iRPE-patch and transwell-iRPE-patch as compared to iPSCs showed similar level of monolayer maturity on the two substrates. (n=3). ANOVA was performed to determine comparability between iRPE on scaffolds and transwell; p-value=0.237 (F, G) Bright field and ZO-1 (red) immunostained images of iRPE from AMD donor 4, iPSC clone C (D4C). (H) ZO-1 immunostained images are segmented using a convolutional neural network to highlight cell borders. Segmented images were used for morphometric analysis. (I) Morphometric analysis performed on ZO-1 stained images of iRPE-patches from all three AMD donors using REShAPE software. 75,000-100,000 cells are imaged per patch and images analyzed to determine the hexagonality score (how hexagonal is the cell) of each RPE cell. Data is displayed as violin plots with the center dot representing the mean and horizontal lines in each plot representing 99% data points. RPE-patch derived from different clones are differently colored (n=8). p-values: Dunn's test was therefore used for reporting multiple pairwise comparisons after a Kruskal-Wallis test for stochastic dominance among k groups was performed. 2B/2C- 3A/3C/3D=0.061; 2B/2C-4A/4B/4C=0.174; 3A/3C/3D-4A/4B/4C=0.757 (J) Graph shows the polarized VEGF secretion (basal/apical ratio) for different AMD-iRPE-patch (n=8). Dunn's test was performed to compare iRPE from different donors: p-values: 2B/2C-3A/3C/3D=0.005; 2B/2C-4A/4B/4C=0.006; 3A/3C/3D -4A/4B/4C =1 (K) Bootstrap hierarchical cluster for PCA of all iRPE from three donors shows samples that are similar and different from each other.

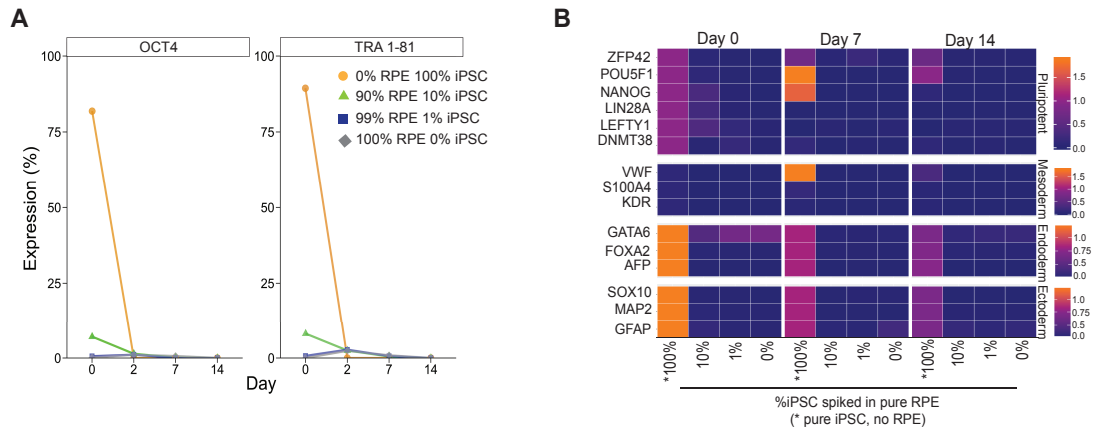

**Fig. S4. Assessment of iPSC-survival in iRPE cultures. (A, B)** *In-vitro* spiking studies performed by seeding mixed cultures of iPSC and RPE on scaffolds (100% iPSC; 10% iPSC+90%RPE; 1% iPSC+99%RPE; and 100% RPE). iPSC-markers (OCT4 and TRA 1-81) were evaluated at days 0, 2, 7, and 14 post seeding by flow cytometry (A). Gene expression analysis of iPSC (ZFP42, OCT4, NANOG, LIN28A, LEFTY1, DNMT38) and lineage-specific markers (mesoderm – VWF, S100A4, KDR; endoderm – GATA6, FOXA2, AFP; non-RPE ectoderm – SOX10, MAP2, GFAP) evaluated at days 0, 7 and 14 days post-seeding of mixed iPSC, RPE cultures. Data is displayed as heat maps of relative  $\Delta$ CT values. All values are normalized to day 0 data (B). This experiment confirms that PLGA scaffolds and RPE maturation medium do not support iPSC or non-RPE lineage growth. Non-RPE lineage genes are not expressed in iRPE-cells.



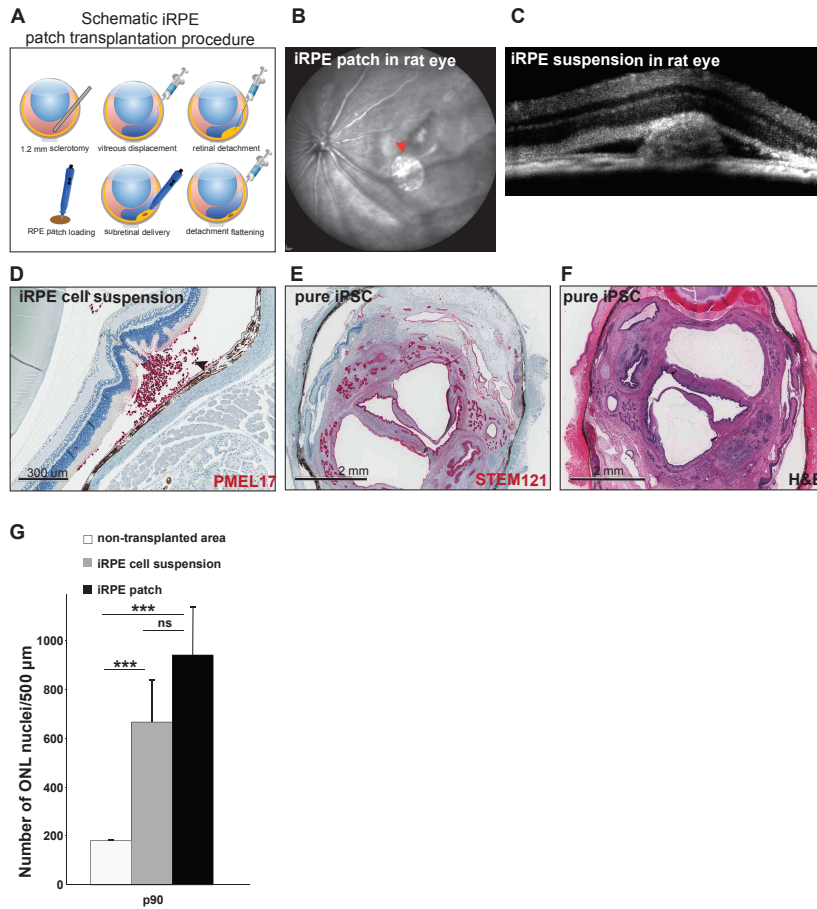

**Fig. S5. Safety and efficacy assessment of iRPE patch in rodents** (A) Schematic of 0.5 mm diameter iRPE-patch transplantation in rat sub-retinal space. Surgery starts with a 1.2 mm sclerotomy, followed by vitreous displacement with hyaluronic acid (HA), retinal detachment by HA injection in the sub-retinal space, iRPE-patch loading in the transplantation tool, delivery of the patch in the sub-retinal space, and flattening of retinal detachment by hyaluronic acid. (B) Visualization of successfully transplanted iRPE-patch in the sub-retinal space of a rat eye. (C) OCT shows transplanted iRPE-suspension in the sub-retinal space of a rat eye. (D-F) Immunohistochemistry for human-specific PMEL17 (red, D) confirms RPE phenotype of injected AMD iRPE cells suspension in the sub-retinal space at 10 weeks post-injection. In contrast, injected human iPSC suspension (STEM121 – red, E) leads to teratoma formation (F) n=10 (3 formed teratoma). (G) Quantification of number of nuclei in the outer nuclear layer (ONL) of RCS rat retina above the area of transplant as compared to the non-transplanted area of the same eye.

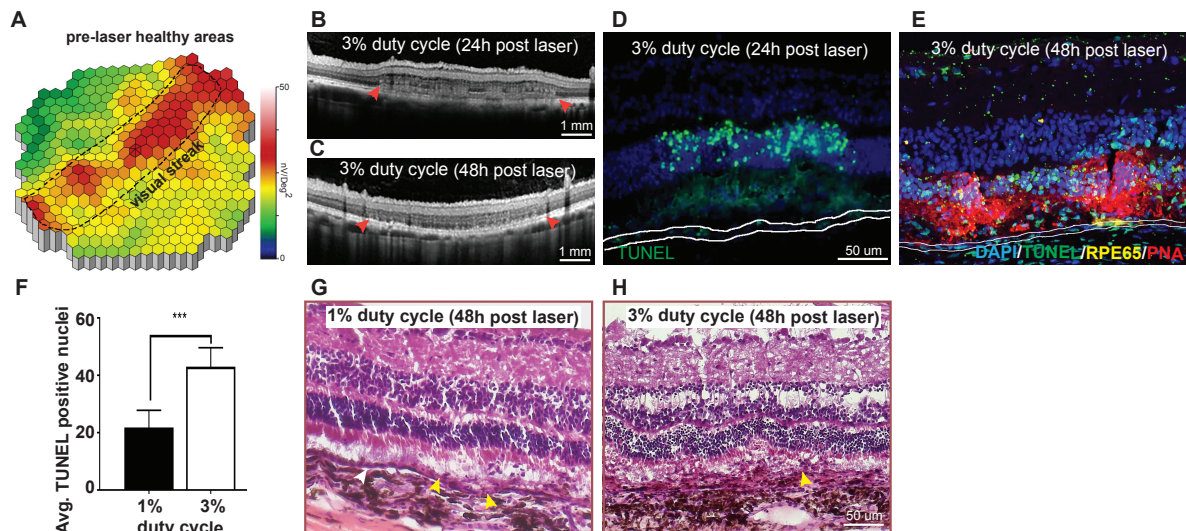

**Fig. S6. Optimization of laser-induced RPE injury in pig eyes.** (A) heatmap showing the average mfERG electrical waveforms responses of the pig eye before the laser was performed. Laser ablation of RPE is performed in the highest electrical activity area, the visual streak (dotted line) of the pig eye. (B, C) OCT of 3% laser duty cycle at 24 and 48 hours post-laser shows RPE and ONL damage and sub-retinal edema (red arrowhead). (D) 3% duty cycle laser area staining with TUNEL (Green) and DAPI (Blue) shows several apoptotic cells in the ONL at 24h. White line shows the RPE monolayer. (E) At 48h, with 3% duty cycle laser, both ONL and RPE are severely damaged, with several apoptotic cells (green) and weak PNA (red) and RPE65 (yellow) staining. (F) Average TUNEL positive ONL nuclei in 1% and 3% laser duty cycle laser damage retina were measured. N=3. (G, H) H &E staining of the 1% (G) and 3% (H) duty cycles laser after 48hours. Healthy area is evident to the left in the 1% duty cycle (G, white arrowhead). Note, disrupted photoreceptors in 3% laser as compared to 1% (yellow arrowheads).

Supplementary Figure 7

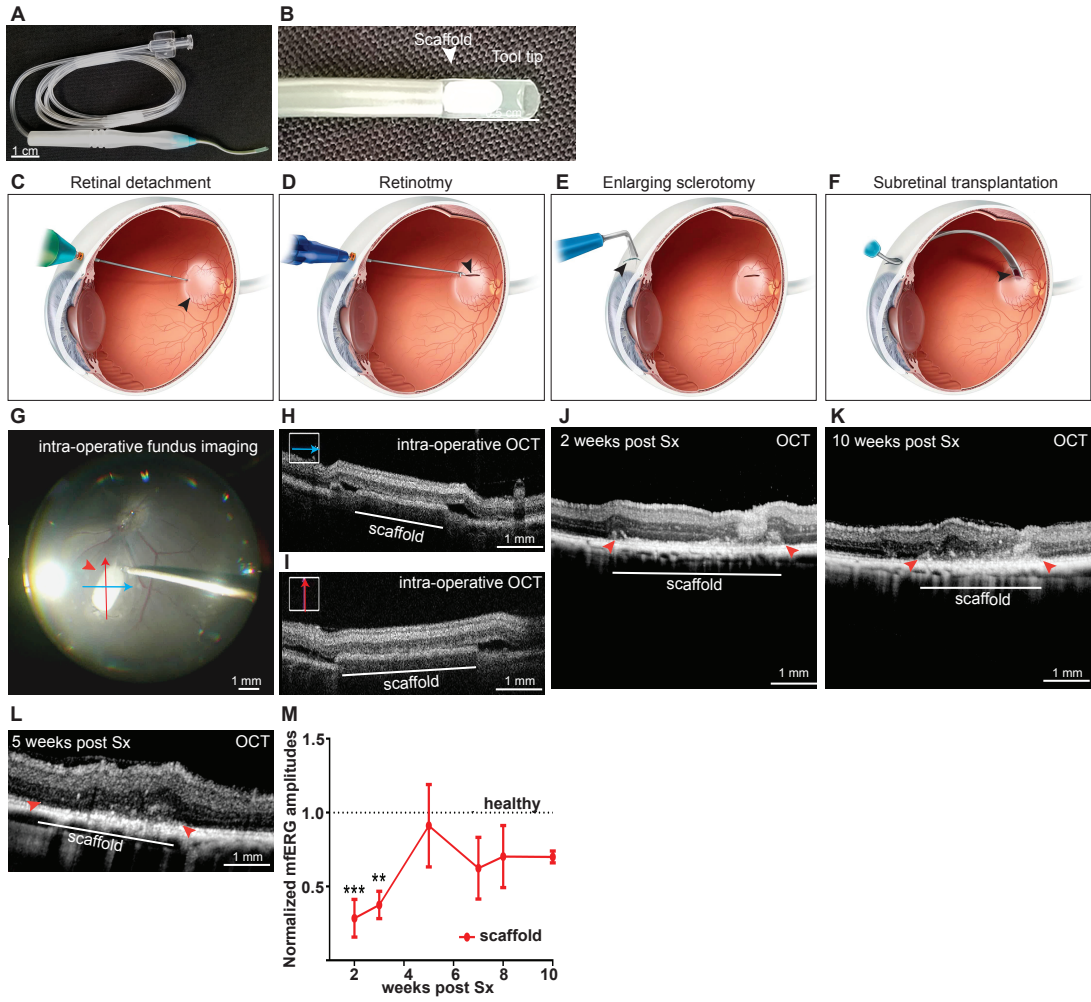

**Fig. S7. Optimization of sub-retinal transplantation procedure in pigs.** (A, B) Image of transplantation tool and the tool tip loaded with an empty-scaffold (arrowhead). (C-F) Schematic of the pig surgery. After a standard four port-vitreotomy, retina is detached using a 38G blunt tip cannula (C), followed by retinotomy (D), enlarging of the sclerotomy (E), and delivery of the human RPE-patch in the sub-retinal space (F). (G-I) Intra-operative fundus imaging and optical coherence tomography (iOCT) performed during surgery confirm delivery of the 4x2 mm scaffold at the intended sub-retinal location. (J-L) OCT of pig eyes two (J), ten weeks (K), five weeks (L) post-surgery confirm empty scaffold degradation in non-immunosuppressed pigs and no inflammation caused by degrading PLGA byproducts. (M) N1P1 mfERG signal over the empty-scaffold shows a significant reduction until week 3, caused likely by the surgical procedure. The signal recovers over time as the surgical damages heals and the scaffold degrades (2-way ANOVA,  $p < 0.0001$ )  $n = 3$ .

Supplementary Figure 8

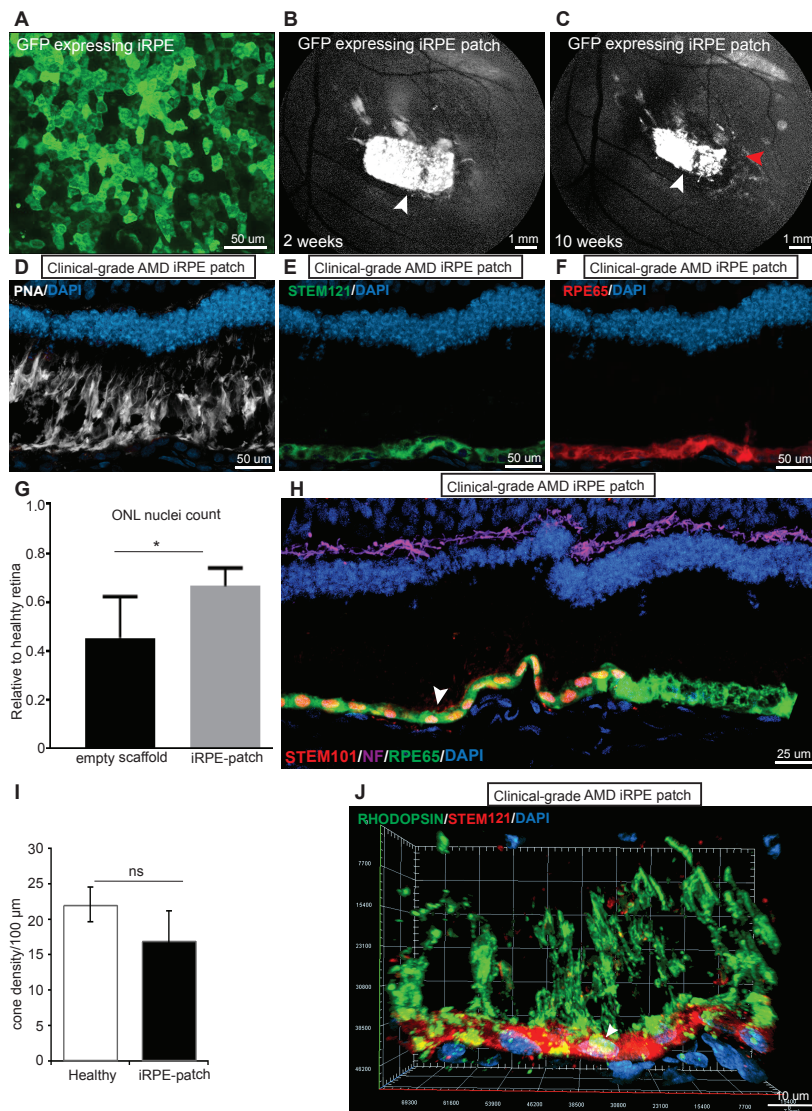

**Fig. S8. Analysis of iRPE-patch in pig model of laser-induced retinal degeneration.** (A) GFP expressing human iRPE-patch. (B, C) Fundus autofluorescence images showing GFP-positive 4x2 mm iRPE-patch under the retina 2 weeks (white arrowhead) and 10 weeks post-transplantation (white arrowhead shows the iRPE-patch and red arrowhead shows the laser area). Note, human cells do not migrate away from the patch. (D-F) Images of human iRPE-patch transplanted area of pig retina stained for photoreceptors (PNA, white, D); and immunostained for human iRPE cells (STEM121, green, E) and RPE (RPE65, red, F). (G) Quantification of the number of nuclei in the outer nuclear layer (ONL) of pig retina above the area of empty scaffold as compared to the area of iRPE-patch. Numbers are presented as fraction of healthy retina. \* $p < 0.05$  determined using two-tailed t-test. (H) Immunostaining for human nuclear antigen STEM101 (red) and RPE65 (green) confirms integration of human iRPE-patch in the pig eye. (I) Quantification of the number of cones in healthy pig retina as compared to the area above the iRPE-patch. Numbers are presented as fraction of healthy retina.  $p$ -value healthy-iRPE-patch = 0.145 determined using two-tailed t-test. (J) 3D reconstruction of Rhodopsin (green) and STEM121 (red) (white arrowheads) immunostained sections of human iRPE-patch transplanted in a pig eye shows photoreceptor outer segments (POS) inside human RPE cells.

Supplementary Figure 9

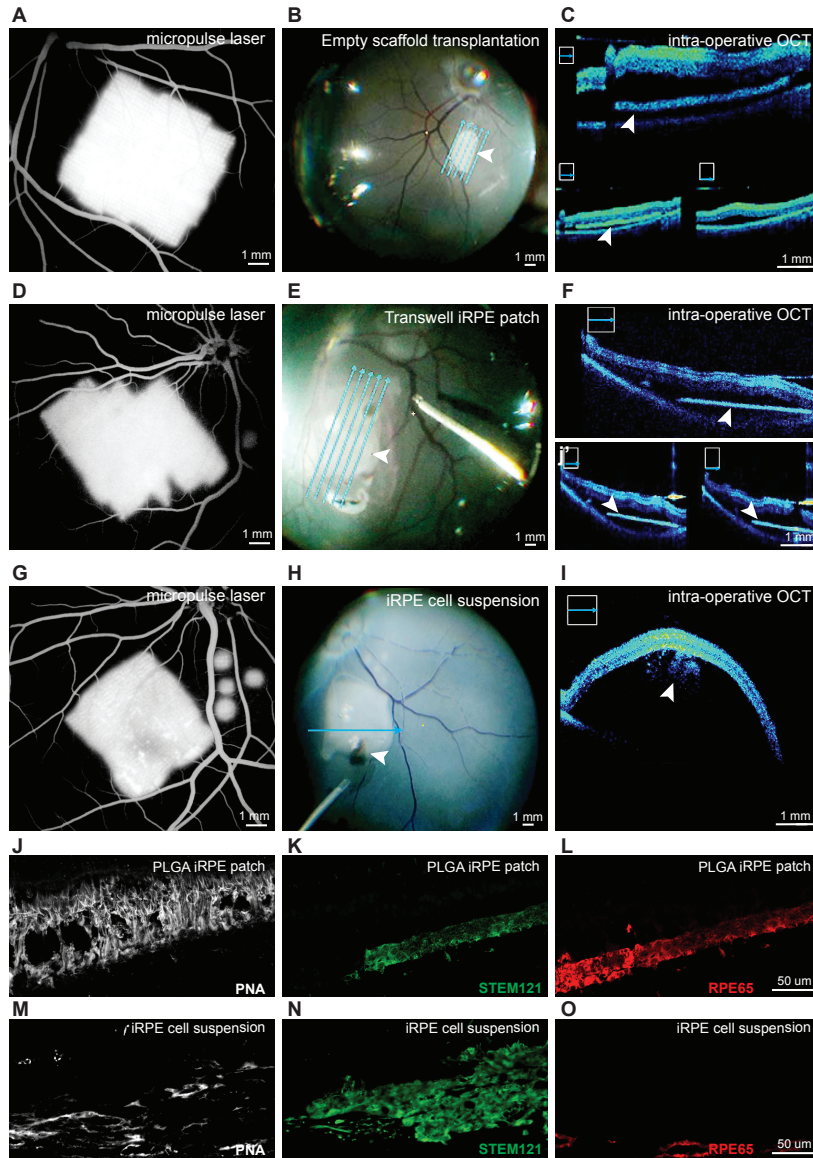

**Fig. S9. Comparative efficacy analysis of iRPE patch and iRPE suspension in the pig model. (A-I)**

Fluorescein angiography (**A, D, G**) confirming micropulse laser based RPE-injury in pig eyes used for empty scaffold (**A**), transwell-iRPE-patch (**D**), and iRPE cell injection (**G**) transplantation. Intra-operative fundus imaging (**B, E, H**), and intra-operative OCT (**C, F, I**) confirming correct delivery of empty scaffold (**B, C**), transwell-iRPE-patch (**E, F**), and iRPE cell injection (**H, I**). White arrowheads mark the various transplants. (**J-L**) Images of human iRPE-patch transplanted area of pig retina stained for photoreceptors (PNA, white, **J**); and immunostained for human iRPE cells (STEM121, green, **K**) and RPE (RPE65, red, **L**). Note, STEM121 label for human cells (see underlined in **K**) stops where the pig RPE begins.



**Table S1:** Validation of clinical (GMP)-grade iPSC Working Bank derived from CD34+ cells. iPSC Working Banks at passage 10 were validated for being sterile (free of bacteria, fungus, and mycoplasma); normal G-band karyotyping; expression of pluripotency markers (SSEA4, TRA1-60, TRA1-81, and OCT4 positivity); percent cells that have lost the reprogramming plasmid; identity of iPSCs with patient material

|   | Age | Pheno-<br>type  | Clone | Sterility/<br>mycoplasma | Karyotype*/<br>Gender | % ve<br>SSEA4 <sup>+</sup><br>cells | % ve<br>TRA1-60 <sup>+</sup><br>cells | % ve<br>TRA1-81 <sup>+</sup><br>cells | % ve<br>OCT4 <sup>+</sup><br>cells | % Cells<br>with<br>plasmid<br>loss | STR analysis<br>PBMC=iPSC<br>(patient<br>match) | Onco-<br>gene<br>sequence<br>(patient<br>match) |
|---|-----|-----------------|-------|--------------------------|-----------------------|-------------------------------------|---------------------------------------|---------------------------------------|------------------------------------|------------------------------------|-------------------------------------------------|-------------------------------------------------|
| 2 | 85  | Bilateral<br>GA | A     | UD                       | Normal 46/XY          | 99.3                                | 99.03                                 | 99.80                                 | 99.94                              | 100                                | matched                                         | matched                                         |
|   |     |                 | B     | UD                       | Normal 46/XY          | 99.50                               | 100                                   | 100                                   | 100                                | 100                                | matched                                         | Several<br>mis-match                            |
|   |     |                 | C     | UD                       | Normal 46/XY          | 99.56                               | 99.56                                 | 100                                   | 99                                 | 100                                | matched                                         | matched                                         |
| 3 | 89  | Bilateral<br>GA | A     | UD                       | Normal 46/XY          | 99.25                               | 99.97                                 | 100.00                                | 99.96                              | 100                                | matched                                         | matched                                         |
|   |     |                 | C     | UD                       | Normal 46/XY          | 99.24                               | 100                                   | 99.95                                 | 100                                | 100                                | matched                                         | matched                                         |
|   |     |                 | D     | UD                       | Normal 46/XY          | 99.25                               | 99.97                                 | 100.00                                | 99.96                              | 100                                | matched                                         | matched                                         |
| 4 | 87  | Bilateral<br>GA | A     | UD                       | Normal 46/XX          | 99.8                                | 100                                   | 100                                   | 99.96                              | 100                                | matched                                         | matched                                         |
|   |     |                 | B     | UD                       | Normal 46/XX          | 99.38                               | 100                                   | 100                                   | 99.96                              | 100                                | matched                                         | matched                                         |
|   |     |                 | C     | UD                       | Normal 46/XX          | 99.8                                | 100                                   | 100                                   | 99.96                              | 100                                | matched                                         | matched                                         |

UD = undetectable. Sterility was tested at WuXi AppTec; G-band Karyotyping and STR analysis was performed at Cell Line Genetics; Plasmid loss was detected using a fluidigm single cell qPCR assay at Cellular Dynamics International, Inc.

## Table S2

### Oncogene exome analysis of iPSC vs donor PBMCs

- 1590\_101, no cancerous mutations in clone
- 1590\_103, no cancerous mutations in clone
- 1590\_104, no cancerous mutations in clone; seven sequence changes in clone
- 1592\_101, no cancerous mutations in clone; one heterozygous splicing change in DNTM3A. This variant is present at a frequency of 0.012 (43 / 3743) in the PBMC donor.
- 1592\_122, no cancerous mutations in clone
- 1592\_123, no cancerous mutations in clone
- 1620\_102, no cancerous mutations in clone; one variant with a one base pair deletion with 0.0261 frequency in the clone and 0.0268 frequency in the donor PBMC
- 1620\_104, no cancerous mutations in clone

TUTE predicted deleterious mutations novel in the clones

#### 1590\_101, no cancerous mutations in clone

Show  entries Code

Search:

| CHROM                      | POS | REF | ALT | GT.x | GT.y | AF.x | AF.y | DP.x | INFO.x |
|----------------------------|-----|-----|-----|------|------|------|------|------|--------|
| No data available in table |     |     |     |      |      |      |      |      |        |

Showing 0 to 0 of 0 entries Previous Next

#### 1590\_103, no cancerous mutations in clone

Show  entries Code

Search:

| CHROM                      | POS | REF | ALT | GT.x | GT.y | AF.x | AF.y | DP.x | INFO.x |
|----------------------------|-----|-----|-----|------|------|------|------|------|--------|
| No data available in table |     |     |     |      |      |      |      |      |        |

Showing 0 to 0 of 0 entries Previous Next

#### 1590\_104, no cancerous mutations in clone; seven new changes in clone

Show  entries Code

Search:

Table S2 contd.

|   | CHROM | POS       | REF | ALT | GT <sub>x</sub> | GT <sub>y</sub> | AF <sub>x</sub> | AF <sub>y</sub> | DP <sub>x</sub> |                                                                                                                                                                    |
|---|-------|-----------|-----|-----|-----------------|-----------------|-----------------|-----------------|-----------------|--------------------------------------------------------------------------------------------------------------------------------------------------------------------|
| 1 | 1     | 156848918 | C   | T   | 011             |                 | 0.441           |                 | 4358            | VC=SNV;Func=exonic;Gene=NTRK1;ExonicFunc=missense;FullAA=NTRK1;NM_001123385.1;ClinVar=Pathogenic;ClinVar_Dis= Familial medullary thyroid carcinoma;Hereditary_inse |
| 2 | 14    | 81606214  | A   | G   | 011             |                 | 0.238           |                 | 4195            | VC=SNV;Func=splicing;Gene=TSFR;Transcript=NM_000369.2;NucleotideChange=                                                                                            |
| 3 | 16    | 89842176  | C   | G   | 011             |                 | 0.196           |                 | 3007            | VC=SNV;Func=exonic;Gene=FANCA;ExonicFunc=missense;FullAA=FANCA;NM_000061.4                                                                                         |
| 4 | 3     | 189455550 | T   | G   | 011             |                 | 0.205           |                 | 4929            | VC=SNV;Func=exonic;Gene=TP63;ExonicFunc=missense;FullAA=TP63;NM_001111111.1                                                                                        |
| 5 | 4     | 55129831  | C   | T   | 011             |                 | 0.184           |                 | 3848            | VC=SNV;Func=splicing;Gene=PDGFRA;Transcript=NM_006206.4;NucleotideChange=                                                                                          |
| 6 | 7     | 140434574 | C   | CA  | 011             |                 | 0.18            |                 | 1314            | VC=INDEL;Func=splicing;Gene=BRAF;Transcript=NM_004333.4;NucleotideChange=                                                                                          |
| 7 | X     | 39911657  | C   | A   | 011             |                 | 0.298           |                 | 1758            | VC=SNV;Func=splicing;Gene=BCOR;Transcript=NM_001123385.1;NucleotideChange=                                                                                         |

Showing 1 to 7 of 7 entries

Previous  Next

*1592\_101, no cancerous mutations in clone; one heterozygous splicing change in DNMT3A. This variant is present at a frequency of 0.012 (43 / 3743) in the PBMC donor.*

Show  entries

Search:

|   | CHROM | POS      | REF | ALT | GT <sub>x</sub> | GT <sub>y</sub> | AF <sub>x</sub> | AF <sub>y</sub> | DP <sub>x</sub> |                                                                                                                                                  |
|---|-------|----------|-----|-----|-----------------|-----------------|-----------------|-----------------|-----------------|--------------------------------------------------------------------------------------------------------------------------------------------------|
| 1 | 2     | 25470029 | T   | C   | 011             |                 | 0.499           |                 | 5439            | VC=SNV;Func=splicing;Gene=DNMT3A;Transcript=NM_175629.2;NucleotideChange=2A>C;MutTaster=1.000;MutTaster_Pred=D;GERP+_RS=4.0;phyloP46way_placenta |

Showing 1 to 1 of 1 entries

Previous  Next

*1592\_122, no cancerous mutations in clone*

Show  entries

Search:

|                            | CHROM | POS | REF | ALT | GT <sub>x</sub> | GT <sub>y</sub> | AF <sub>x</sub> | AF <sub>y</sub> | DP <sub>x</sub> | INFO <sub>x</sub> |
|----------------------------|-------|-----|-----|-----|-----------------|-----------------|-----------------|-----------------|-----------------|-------------------|
| No data available in table |       |     |     |     |                 |                 |                 |                 |                 |                   |

Showing 0 to 0 of 0 entries

Previous Next

*1592\_123, no cancerous mutations in clone*

Show  entries

Search:

|                            | CHROM | POS | REF | ALT | GT <sub>x</sub> | GT <sub>y</sub> | AF <sub>x</sub> | AF <sub>y</sub> | DP <sub>x</sub> | INFO <sub>x</sub> |
|----------------------------|-------|-----|-----|-----|-----------------|-----------------|-----------------|-----------------|-----------------|-------------------|
| No data available in table |       |     |     |     |                 |                 |                 |                 |                 |                   |

Table S2 contd..

Showing 0 to 0 of 0 entries

[Previous](#) [Next](#)

*1620\_102, no cancerous mutations in clone; one variant with a one base pair deletion with 0.0261 frequency in the clone and 0.0268 frequency in the donor PBMC*

Show  entries

Search:

[Code](#)

| CHROM | POS | REF       | ALT | GT <sub>x</sub> | GT <sub>y</sub> | AF <sub>x</sub> | AF <sub>y</sub> | DP <sub>x</sub> | INFO <sub>x</sub>                                                                                                          |
|-------|-----|-----------|-----|-----------------|-----------------|-----------------|-----------------|-----------------|----------------------------------------------------------------------------------------------------------------------------|
| 1     | 5   | 131931451 | TA  | T               | 0 1             | 0.0261          |                 | 2945            | VC=INDEL;Func=exonic;Gene=RAD50;ExonicFunc=frame shift;FullAA=RAD50:NM_005732.3:exon13:c.2157delA;p.L719fs;Transcript=NM_0 |

Showing 1 to 1 of 1 entries

[Previous](#)  [Next](#)

*1620\_104, no cancerous mutations in clone*

Show  entries

Search:

[Code](#)

| CHROM                      | POS | REF | ALT | GT <sub>x</sub> | GT <sub>y</sub> | AF <sub>x</sub> | AF <sub>y</sub> | DP <sub>x</sub> | INFO <sub>x</sub> |
|----------------------------|-----|-----|-----|-----------------|-----------------|-----------------|-----------------|-----------------|-------------------|
| No data available in table |     |     |     |                 |                 |                 |                 |                 |                   |

Showing 0 to 0 of 0 entries

[Previous](#) [Next](#)

**Table S3**

Detailed list of clinical-grade reagents used in iPSC generation and RPE differentiation

| Reagents                                                                                           | Vendor                     | Catalogue              | Use description                      |
|----------------------------------------------------------------------------------------------------|----------------------------|------------------------|--------------------------------------|
| Plasmid 149                                                                                        | Aldevron                   | p149                   | Reprogramming                        |
| Plasmid 150                                                                                        | Aldevron                   | p150                   | Reprogramming                        |
| ViCell concentration control<br>8X106 Beads/mL                                                     | Beckman Coulter            | B78897                 | Differentiation                      |
| CryoStor CS10                                                                                      | BioLife Solutions          | 210102                 | Ficoll/Reprogramming/Differentiation |
| TPO 50 ug                                                                                          | CellGenix                  | 1017-050               | Reprogramming                        |
| triCitrasol                                                                                        | Citra Labs                 | PN6030                 | Ficoll                               |
| Fetal Bovine Serum (U.S.),<br>Characterized                                                        | GE Healthcare<br>(Hyclone) | SH30071.03             | Differentiation                      |
| DNase I (PULMOZYME) (2 ug<br>in 2 mL)                                                              | Genentech                  | 50242-100-040<br>10039 | Reprogramming                        |
| Lymphocyte Separation Medium                                                                       | Lonza/corning              | 17-829E/25-<br>072-C1  | Ficoll                               |
| CD34 Nucleofactor® Solution                                                                        | Lonza                      | VPA-1003               | Reprogramming                        |
| CD34 Nucleofactor®<br>Supplement                                                                   | Lonza                      | VPA-1003               | Reprogramming                        |
| DPBS without Ca <sup>++</sup> and Mg <sup>++</sup>                                                 | Lonza/Life<br>Technology   | 17-<br>512F/14190250   | Ficoll/Reprogramming/Differentiation |
| Versene Solution                                                                                   | Thermo Fisher              | 15040-066              | Reprogramming/Differentiation        |
| Recombinant hLIF (10 ug/ml)                                                                        | Millipore                  | LIF1010                | Reprogramming                        |
| H-1152 (1 mg)                                                                                      | Millipore                  | 555550                 | Differentiation                      |
| CliniMACS® PBS/EDTA Buffer                                                                         | Miltenyi Biotec            | 700-25                 | Reprogramming                        |
| CliniMACs CD34+ microbeads                                                                         | Miltenyi Biotec            | 171-01                 | Reprogramming                        |
| CliniMACS CD56 microbeads                                                                          | Miltenyi Biotec            | 130-019-401            | Differentiation                      |
| CliniMACS Anti-Biotin<br>microbeads                                                                | Miltenyi Biotec            | 130-019-201            | Differentiation                      |
| Mouse Anti-CD24 (Biotin<br>Conjugated)                                                             | Miltenyi Biotec            | Custom made            | Differentiation                      |
| DMSO                                                                                               | Mylan<br>Institutional     | 67457-178-10           | Reprogramming/Differentiation        |
| Flt-3 (50ug)                                                                                       | R&D Systems                | 308-GMP-050            | Reprogramming                        |
| SCF (50ug)                                                                                         | R&D Systems                | 255-GMP-050            | Reprogramming                        |
| IL-6 (50ug)                                                                                        | R&D Systems                | 206-GMP-050            | Reprogramming                        |
| IL-3 (50ug)                                                                                        | R&D Systems                | 203-GMP-050            | Reprogramming                        |
| Recombinant Human Activin A,<br>Animal-Free (60 ug, 645 ul /vial,<br>0.094 mg/ml) CUSTOM<br>VIALED | R&D Systems                | AFL 338                | Differentiation                      |
| Recombinant Human IGF-I,<br>Animal-Free (5.5 ug, 55 uL)-<br>CUSTOM VIALED                          | R&D Systems                | 291-GMP-<br>5.5ug      | Differentiation                      |
| PGE2 (10 mg)                                                                                       | R&D Systems                | 2296                   | Differentiation                      |

Table S3 contd..

|                                               |                          |                  |                               |
|-----------------------------------------------|--------------------------|------------------|-------------------------------|
| SB431542 Hydrate (10 mg)                      | R&D Systems              | 1614             | Differentiation               |
| Blebbistatin (5 mg)                           | Sigma Aldrich            | B0560            | Differentiation               |
| Ascorbic Acid (2 g)                           | Sigma Aldrich            | PHR1008-2G       | Differentiation               |
| CKI-7 Dihydrochloride (5 mg)                  | Sigma Aldrich            | C0742-5mg        | Differentiation               |
| Niacinamide (1g)                              | Sigma Aldrich            | PHR1033-1G       | Differentiation               |
| Taurine (1g)                                  | Sigma Aldrich            | PHR1109-1G       | Differentiation               |
| Hydrocortisone (50 uM)                        | Sigma Aldrich            | H-6909           | Differentiation               |
| 3,3',5-Triiodo-L-thyronine sodium salt (1 mg) | Sigma Aldrich            | T5516            | Differentiation               |
| Y-27632 (1mg)                                 | Sigma Aldrich            | Y0503-1MG        | Reprogramming                 |
| Beta-Mercaptoethanol                          | Sigma Aldrich            | 07604            | Reprogramming                 |
| HA-100 (5 mg)                                 | StemCell Technologies    | 72482            | Reprogramming                 |
| StemSpan ACF                                  | StemCell Technologies    | 09805            | Reprogramming                 |
| CHIR99021 (2 mg)                              | Stemgent                 | 04-0004-02       | Reprogramming                 |
| A-83-01 (2 mg)                                | Stemgent                 | 04-0014          | Reprogramming                 |
| LDN-193189 (10 mg)                            | Stemgent                 | 04-0074-10       | Differentiation               |
| PD325901 (2mg)                                | Stemgent                 | 04-0006          | Differentiation               |
| Retronectin (2.5 mg)                          | Takara                   | T202             | Reprogramming                 |
| UltraPure 0.5M EDTA, pH 8                     | Thermo Fisher            | 15575-020        | Differentiation               |
| CTS N2 Supplement (100 X)                     | Thermo Fisher            | A13707-01        | Reprogramming/Differentiation |
| 100x Glutamax                                 | Thermo Fisher            | 35050-061        | Reprogramming                 |
| E8 Basal medium                               | Thermo Fisher            | A15169-01        | Reprogramming/Differentiation |
| E8 supplement                                 | Thermo Fisher            | A15170-01        | Reprogramming                 |
| CTS Vitronectin (VTN-N)                       | Thermo Fisher            | A27940           | Reprogramming/Differentiation |
| DMEM/F12, HEPES                               | Thermo Fisher            | 11330-032        | Reprogramming/Differentiation |
| MEM Alpha, nucleosides                        | Thermo Fisher            | 12571-063        | Differentiation               |
| MEM non-essential AA                          | Thermo Fisher            | 11140-050        | Differentiation               |
| Sodium Pyruvate (100 mM)                      | Thermo Fisher            | 11360-070        | Differentiation               |
| CTS KnockOut™ SR XenoFree                     | Thermo Fisher            | A1099201         | Differentiation               |
| B-27 Supplement 50 X, Serum free              | Thermo Fisher            | 17504-044        | Differentiation               |
| CTS TrypLE Select Enzyme                      | Thermo Fisher            | A12859-01        | Reprogramming/Differentiation |
| Water for injection (WFI)                     | APP Pharmaceuticals      | NDC-63323-185-10 | Reprogramming/Differentiation |
| CTS B-27 Supplement, XenoFree                 | Thermo Fisher            | A14867-01        | Reprogramming                 |
| Recombinant human FGF2 (0.1 mg/ml)            | Waisman Biomanufacturing | WC-FGF2-FP-003   | Reprogramming                 |
| 10 M NaOH                                     | Sigma Aldrich            | 72068            | Differentiation               |
| ViCell Reagent Pack                           | Beckman Coulter          | 383722           | Differentiation               |

Certificate of Analysis for all reagents have been validated for all these reagents for our clinical-grade manufacturing processes.

**Table S4: Summary of Body Weight Change in Rats Transplanted with iPSC-derived RPE**

| Days                 |      | Weekly body weight (grams) |      |      |      |      |      |      |      |      |      |
|----------------------|------|----------------------------|------|------|------|------|------|------|------|------|------|
|                      |      | 1                          | 8    | 15   | 22   | 29   | 36   | 43   | 50   | 57   | 64   |
| Vehicle control*     | Mean | 234                        | 234  | 254  | 272  | 283  | 290  | 295  | 304  | 309  | 316  |
|                      | SD   | 24.0                       | 26.1 | 26.2 | 24.5 | 28.7 | 25.1 | 27.0 | 27.3 | 30.8 | 30.6 |
| iPSC-RPE sheet*      | Mean | 233                        | 233  | 250  | 273  | 285  | 293  | 289  | 294  | 292  | 303  |
|                      | SD   | 19.6                       | 20.9 | 21.8 | 23.6 | 25.7 | 27.8 | 27.8 | 30.9 | 33.3 | 31.2 |
| iPSC-RPE suspension* | Mean | 270                        | 270  | 283  | 273  | 288  | 296  | 303  | 304  | 307  | 315  |
|                      | SD   | 29.0                       | 26.8 | 24.9 | 27.2 | 25.3 | 24.9 | 26.7 | 26.0 | 28.3 | 29.3 |

\*overall p-value (p>0.1) determined using ANOVA and Dunnett's test

**Summary of Daily Food Consumption in Rats Transplanted with iPSC-derived RPE**

| Days                 |      | Food consumption (grams/animal/day) |      |       |       |       |       |       |       |       |       |
|----------------------|------|-------------------------------------|------|-------|-------|-------|-------|-------|-------|-------|-------|
|                      |      | 1-8                                 | 8-15 | 15-22 | 22-29 | 29-36 | 36-43 | 43-50 | 50-57 | 57-64 | 64-71 |
| Vehicle control*     | Mean | 17                                  | 16   | 19    | 18    | 19    | 18    | 18    | 18    | 18    | 18    |
|                      | SD   | 0.7                                 | 1.5  | 2.1   | 1.3   | 1.2   | 1.7   | 1.8   | 1.0   | 1.3   | 1.2   |
| iPSC-RPE sheet*      | Mean | 16                                  | 17   | 20    | 19    | 19    | 17    | 18    | 17    | 18    | 19    |
|                      | SD   | 2.6                                 | 1.3  | 1.3   | 1.2   | 1.4   | 1.0   | 1.4   | 0.8   | 1.2   | 1.0   |
| iPSC-RPE suspension* | Mean | 17                                  | 17   | 19    | 18    | 18    | 17    | 17    | 18    | 18    | 17    |
|                      | SD   | 0.9                                 | 1.3  | 3.0   | 1.0   | 1.3   | 1.0   | 1.1   | 1.2   | 0.9   | 1.0   |

\*overall p-value (p>0.1) determined using ANOVA and Dunnett's test

**Table S4.** Lactic acid released by the PLGA scaffold during degradation. Days 1-35 are the in vitro stage of the scaffold and days 35 onwards are in vivo after transplantation. Grey highlights the days of PLGA scaffold bulk degradation phase (days 19-36). Note, the bulk degradation of the scaffold occurs in vitro.

|                                                                                 | Samples                   | mmol/L/scaffold/day | percent lactic acid released/scaffold/week |
|---------------------------------------------------------------------------------|---------------------------|---------------------|--------------------------------------------|
| In vitro stage of iPSC-RPE-patch maturation                                     | 1-1 to 1-6 (days 1-6)     | 0.00047±0.00016     | 4.2%±1.7%                                  |
|                                                                                 | 2-1 to 2-6 (days 7-12)    | 0.00047±0.00016     | 4.2%±1.7%                                  |
|                                                                                 | 3-1 to 3-6 (days 13-18)   | 0.00047±0.00016     | 4.2%±1.7%                                  |
|                                                                                 | 4-1 to 4-6 (days 19-24)   | 0.00297±0.00056     | 31.9%±4.0%                                 |
|                                                                                 | 5-1 to 5-6 (days 25-30)   | 0.00273±0.00069     | 29.4%±7.5%                                 |
|                                                                                 | 6-1 to 6-6 (days 31-36)   | 0.00089±0.00048     | 9.6%±4.9%                                  |
| In vitro stage of iPSC-RPE-patch after transplantation in the sub-retinal space | 7-1 to 7-6 (days 37-42)   | 0.00047±0.00016     | 4.2%±1.7%                                  |
|                                                                                 | 8-1 to 8-6 (days 43-48)   | 0.00047±0.00016     | 4.2%±1.7%                                  |
|                                                                                 | 9-1 to 9-6 (days 48-54)   | 0.00047±0.00016     | 4.2%±1.7%                                  |
|                                                                                 | 10-1 to 10-6 (days 54-60) | 0.00047±0.00016     | 4.2%±1.7%                                  |



Image Replicates for Figure 2

Figure 2C - second replicates

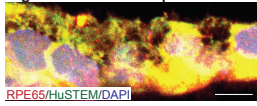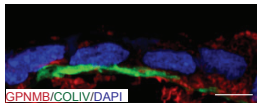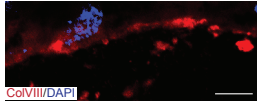

Figure 2C - third replicates

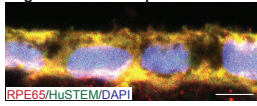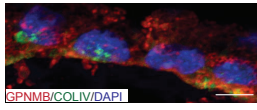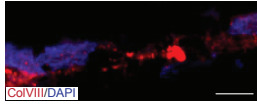

Figure 2D - second replicates

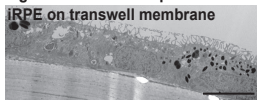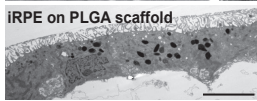

Figure 2D - third replicates

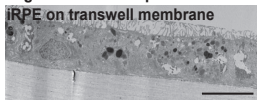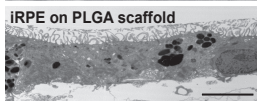

Image Replicates for Figure 3

Figure 3A,B - second replicate

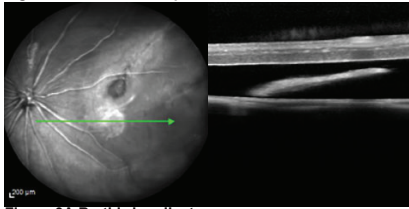

Figure 3A,B - third replicate

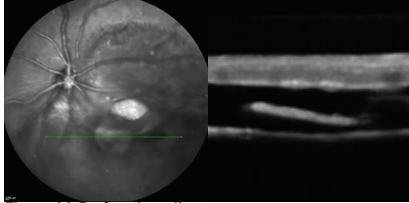

Figure 3A,B - fourth replicate

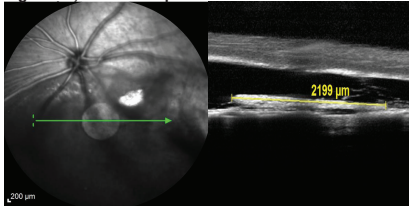

Figure 3C - second replicate

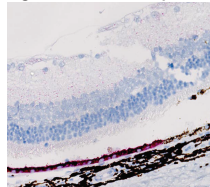

Figure 3C - third replicate

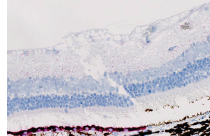

Figure 3C - fourth replicate

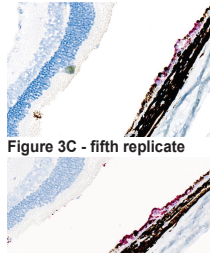

Figure 3C - fifth replicate

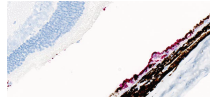

Figure 3C - sixth replicate

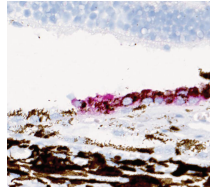

Figure 3C - seventh replicate

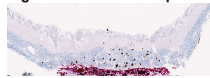

Figure 3C - eighth replicate

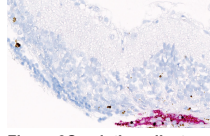

Figure 3C - ninth replicate

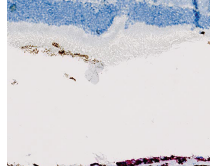

Figure 3C - tenth replicate

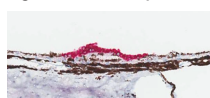

Figure 3D-E - second replicate

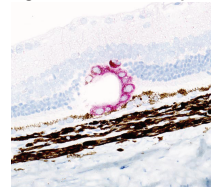

Figure 3D-E - third replicate

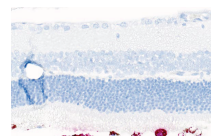

Figure 3D-E - fourth replicate

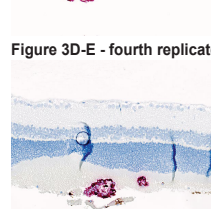

Figure 3D-E - fifth replicate

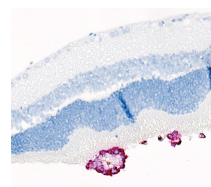

Figure 3D-E - sixth replicate

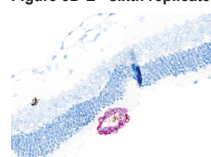

Figure 3D-E - seventh replicate

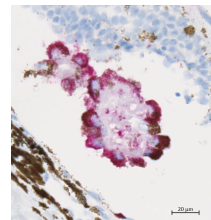

Figure 3F - second replicate

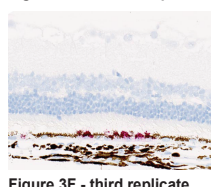

Figure 3F - third replicate

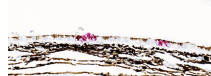

Figure 3F - fourth replicate

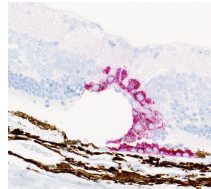

Figure 3F - fifth replicate

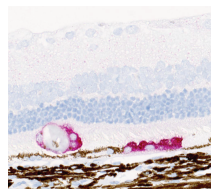

Figure 3F - sixth replicate

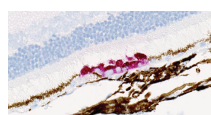

Figure 3F - seventh replicate

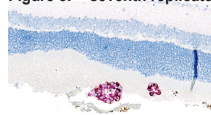

Figure 3D-F - eighth replicate

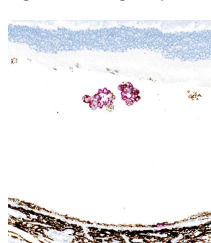

Image Replicates for Figure 4

Figure 4B- second replicate

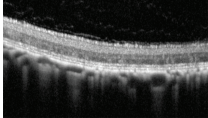

Figure 4C- second replicate

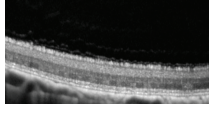

Figure 4B- third replicate

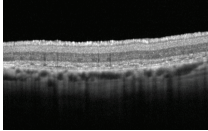

Figure 4C- third replicate

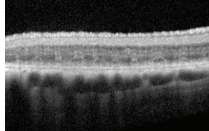

Figure 4H - second replicate

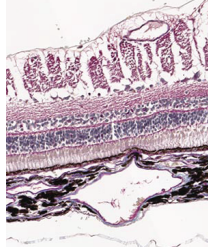

Figure 4H- third replicate

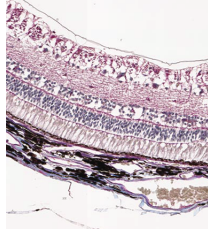

Figure 4I - second replicate

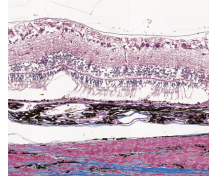

Image Replicates for Figure 5

Figure 5A- second replicate

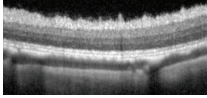

Figure 5B- second replicate

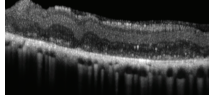

Figure 5C - second replicate

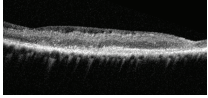

Figure 5A- third replicate

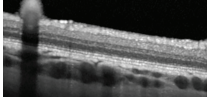

Figure 5B- third replicate

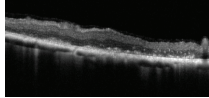

Figure 5C- third replicate

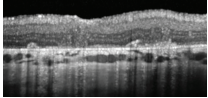

Figure 5D- second replicate

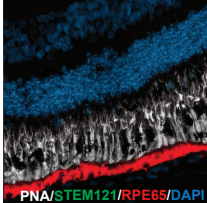

Figure 5D- third replicate

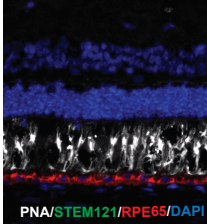

Figure 5E- second replicate

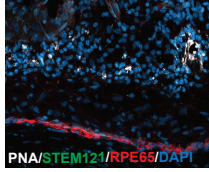

Figure 5E- third replicate

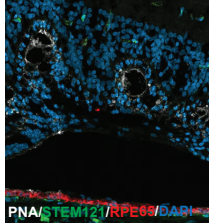

Figure 5F - second replicate

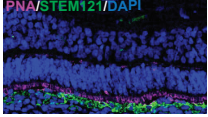

Figure 5F- third replicate

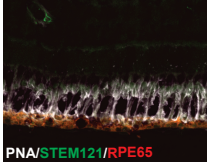

Image Replicates for Figure 6

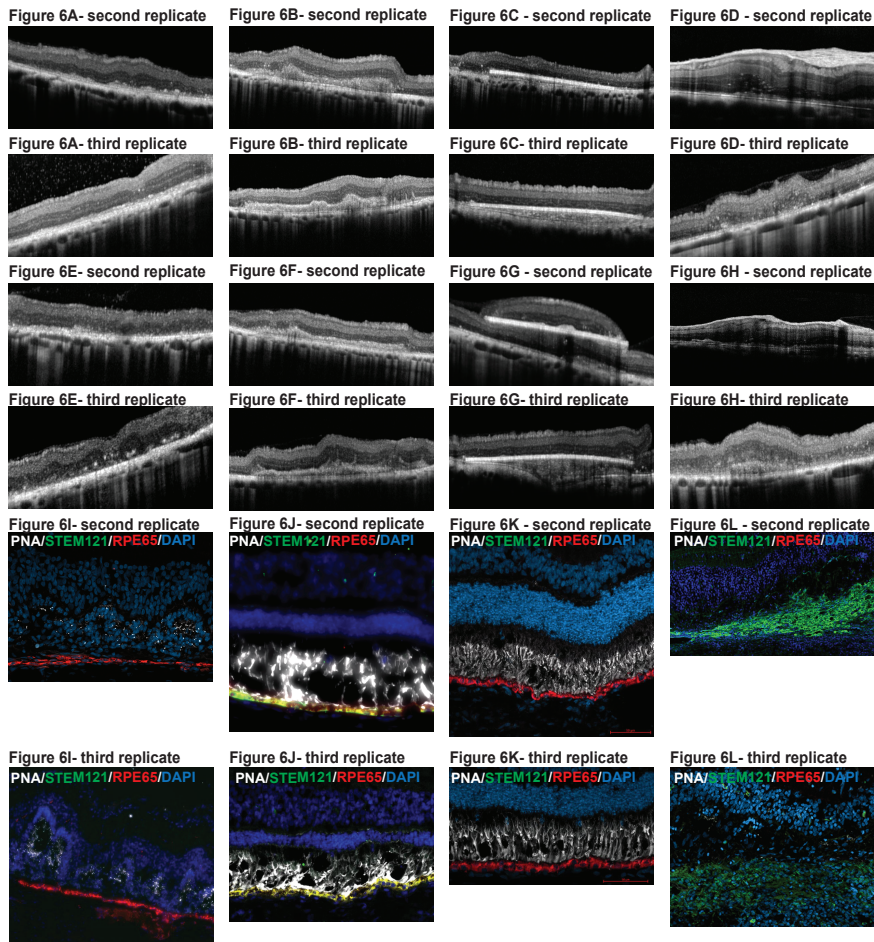

Supplement: NIHMS1770370-supplement-1.pdf [file NIHMS1770370-supplement-1.pdf]
