# Supplementary material
Source: PubMed Central journal article supplement (PMC8784963)

**A Research-grade triphasic RPE differentiation protocol (107 days)**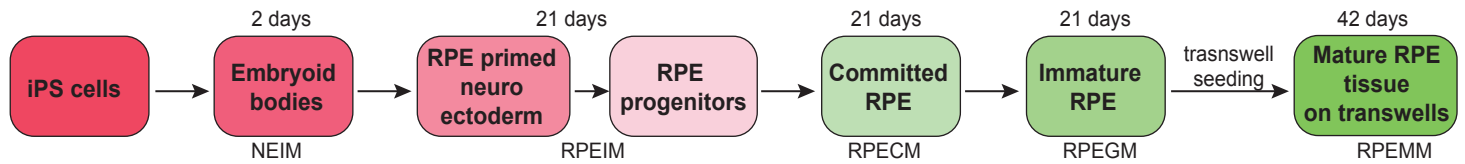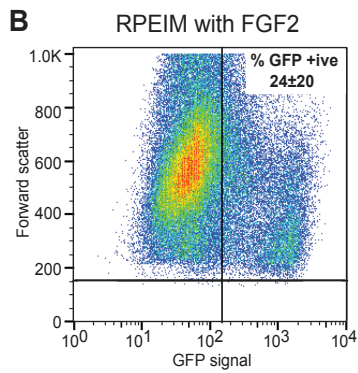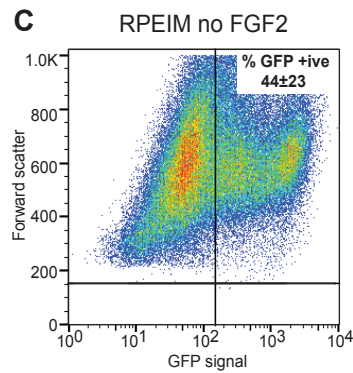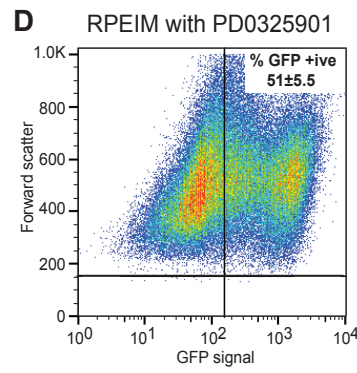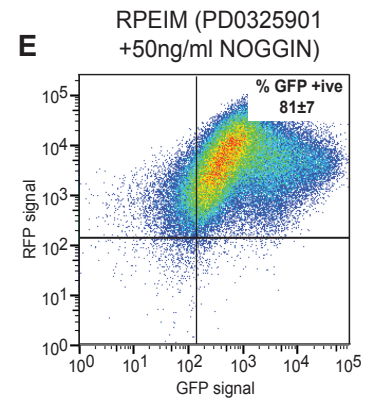

**F**

| Percent GFP positive cells in RPECM with: |          |
|-------------------------------------------|----------|
| ACTIVIN A - (A)                           | 69 ± 16  |
| Nicotinamide +ACTIVIN A - (NA)            | 81 ± 7   |
| WNT3a (W)                                 | 83 ± 8.5 |
| Nicotinamide + ACTIVIN A + WNT3 (NAW)     | 82 ± 10  |

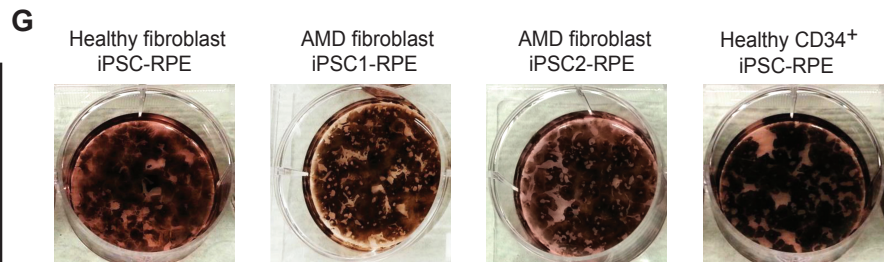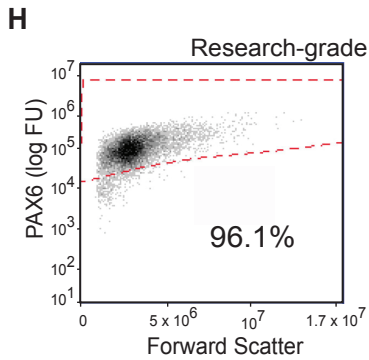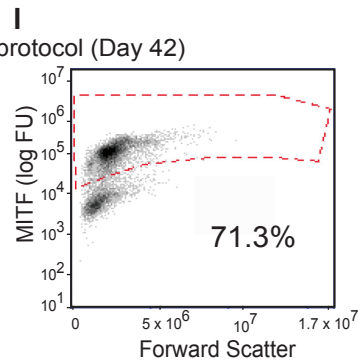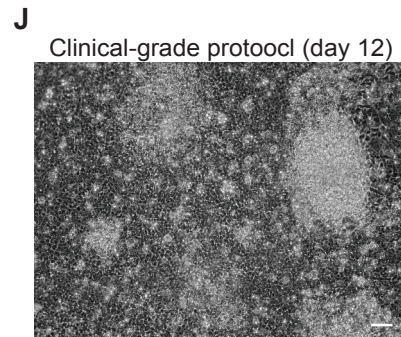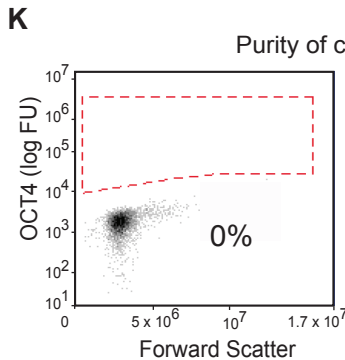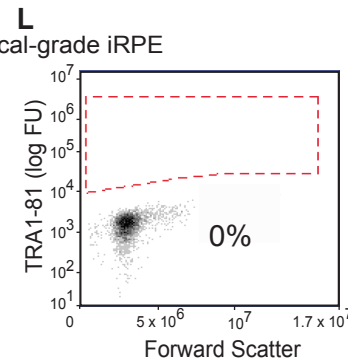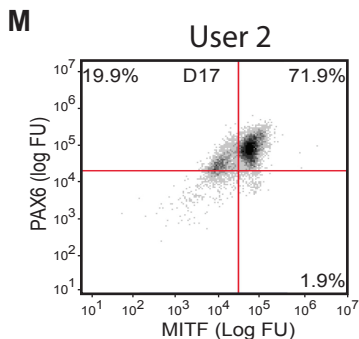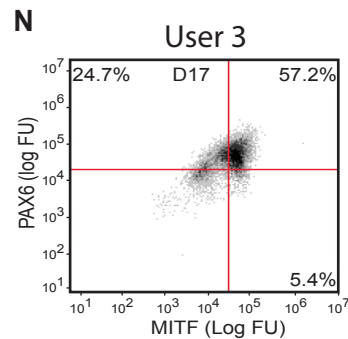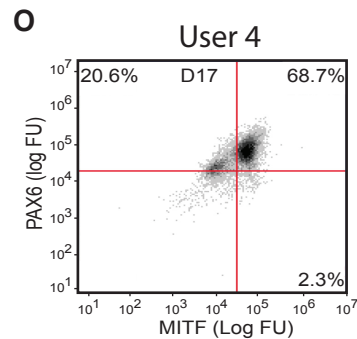

Supplement: NIHMS1770370-supplement-Supple_Fig1.pdf [file NIHMS1770370-supplement-Supple_Fig1.pdf]
