# Supplementary material
Source: PubMed Central journal article supplement (PMC8784963)

*In vitro* degradation of PLGA scaffolds - side view

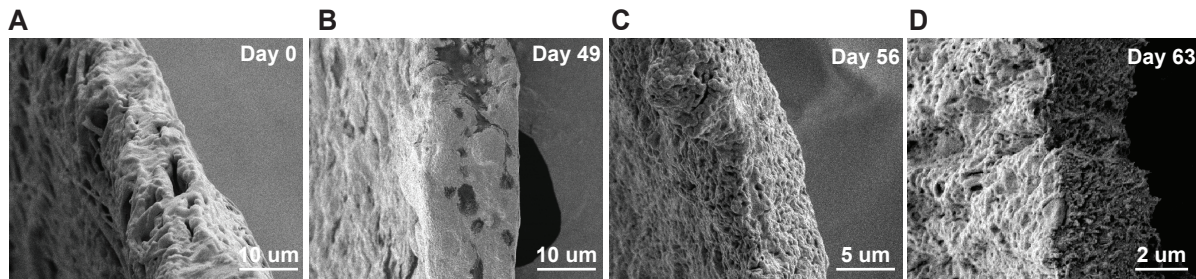

*In vitro* degradation of PLGA scaffolds - top view

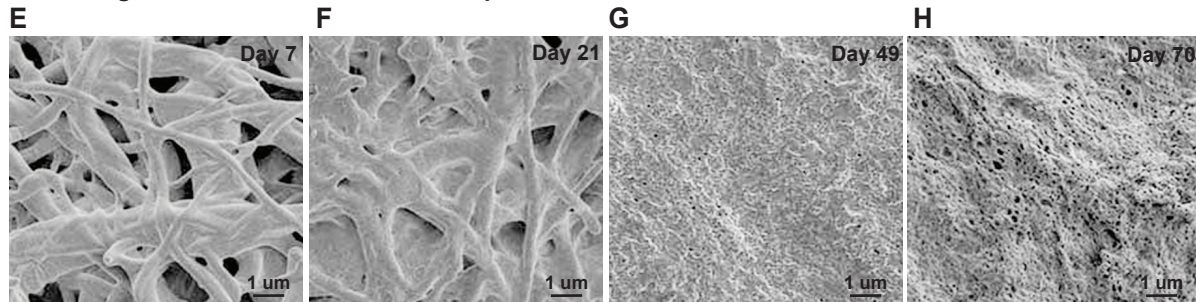

Supplement: NIHMS1770370-supplement-Supple_Fig2.pdf [file NIHMS1770370-supplement-Supple_Fig2.pdf]
