# Supplementary material
Source: PubMed Central journal article supplement (PMC8784963)
Supplement: NIHMS1770370-supplement-SuppleTable1.pdf [file NIHMS1770370-supplement-SuppleTable1.pdf]

**Table S1:** Validation of clinical (GMP)-grade iPSC Working Bank derived from CD34+ cells. iPSC Working Banks at passage 10 were validated for being sterile (free of bacteria, fungus, and mycoplasma); normal G-band karyotyping; expression of pluripotency markers (SSEA4, TRA1-60, TRA1-81, and OCT4 positivity); percent cells that have lost the reprogramming plasmid; identity of iPSCs with patient material

|          | Age | Pheno-<br>type  | Clone | Sterility/<br>mycoplasma | Karyotype*/<br>Gender | % ve<br>SSEA4 <sup>+</sup><br>cells | % ve<br>TRA1-60 <sup>+</sup><br>cells | % ve<br>TRA1-81 <sup>+</sup><br>cells | % ve<br>OCT4 <sup>+</sup><br>cells | % Cells<br>with<br>plasmid<br>loss | STR analysis<br>PBMC=iPSC<br>(patient<br>match) | Onco-<br>gene<br>sequence<br>(patient<br>match) |
|----------|-----|-----------------|-------|--------------------------|-----------------------|-------------------------------------|---------------------------------------|---------------------------------------|------------------------------------|------------------------------------|-------------------------------------------------|-------------------------------------------------|
| <b>2</b> | 85  | Bilateral<br>GA | A     | UD                       | Normal 46/ XY         | 99.3                                | 99.03                                 | 99.80                                 | 99.94                              | 100                                | matched                                         | matched                                         |
|          |     |                 | B     | UD                       | Normal 46/ XY         | 99.50                               | 100                                   | 100                                   | 100                                | 100                                | matched                                         | Several<br>mis-match                            |
|          |     |                 | C     | UD                       | Normal 46/ XY         | 99.56                               | 99.56                                 | 100                                   | 99                                 | 100                                | matched                                         | matched                                         |
| <b>3</b> | 89  | Bilateral<br>GA | A     | UD                       | Normal 46/XY          | 99.25                               | 99.97                                 | 100.00                                | 99.96                              | 100                                | matched                                         | matched                                         |
|          |     |                 | C     | UD                       | Normal 46/ XY         | 99.24                               | 100                                   | 99.95                                 | 100                                | 100                                | matched                                         | matched                                         |
|          |     |                 | D     | UD                       | Normal 46/ XY         | 99.25                               | 99.97                                 | 100.00                                | 99.96                              | 100                                | matched                                         | matched                                         |
| <b>4</b> | 87  | Bilateral<br>GA | A     | UD                       | Normal 46/ XX         | 99.8                                | 100                                   | 100                                   | 99.96                              | 100                                | matched                                         | matched                                         |
|          |     |                 | B     | UD                       | Normal 46/ XX         | 99.38                               | 100                                   | 100                                   | 99.96                              | 100                                | matched                                         | matched                                         |
|          |     |                 | C     | UD                       | Normal 46/ XX         | 99.8                                | 100                                   | 100                                   | 99.96                              | 100                                | matched                                         | matched                                         |

UD = undetectable. Sterility was tested at WuXi AppTec; G-band Karyotyping and STR analysis was performed at Cell Line Genetics; Plasmid loss was detected using a fluidigm single cell qPCR assay at Cellular Dynamics International, Inc.
