# Supplementary material
Source: PubMed Central journal article supplement (PMC8784963)
Supplement: NIHMS1770370-supplement-SuppleTable2_1.pdf [file NIHMS1770370-supplement-SuppleTable2_1.pdf]

# Table S2

## Oncogene exome analysis of iPSC vs donor PBMCs

- 1590\_101, no cancerous mutations in clone
- 1590\_103, no cancerous mutations in clone
- 1590\_104, no cancerous mutations in clone; seven sequence changes in clone
- 1592\_101, no cancerous mutations in clone; one heterozygous splicing change in DNTM3A. This variant is present at a frequency of 0.012 (43 / 3743) in the PBMC donor.
- 1592\_122, no cancerous mutations in clone
- 1592\_123, no cancerous mutations in clone
- 1620\_102, no cancerous mutations in clone; one variant with a one base pair deletion with 0.0261 frequency in the clone and 0.0268 frequency in the donor PBMC
- 1620\_104, no cancerous mutations in clone

TUTE predicted deleterious mutations novel in the clones

### *1590\_101, no cancerous mutations in clone*

Code

Show  entries

Search:

| CHROM                      | POS | REF | ALT | GT.x | GT.y | AF.x | AF.y | DP.x | INFO.x |
|----------------------------|-----|-----|-----|------|------|------|------|------|--------|
| No data available in table |     |     |     |      |      |      |      |      |        |

Showing 0 to 0 of 0 entries

Previous Next

### *1590\_103, no cancerous mutations in clone*

Code

Show  entries

Search:

| CHROM                      | POS | REF | ALT | GT.x | GT.y | AF.x | AF.y | DP.x | INFO.x |
|----------------------------|-----|-----|-----|------|------|------|------|------|--------|
| No data available in table |     |     |     |      |      |      |      |      |        |

Showing 0 to 0 of 0 entries

Previous Next

### *1590\_104, no cancerous mutations in clone; seven new changes in clone*

Code

Show  entries

Search:
