# Supplementary material
Source: PubMed Central journal article supplement (PMC8784963)
Supplement: NIHMS1770370-supplement-SuppleTable2_2.pdf [file NIHMS1770370-supplement-SuppleTable2_2.pdf]

Table S2 contd.

|   | CHROM | POS       | REF | ALT | GT.x | GT.y | AF.x  | AF.y | DP.x |                                                                                                                                                              |
|---|-------|-----------|-----|-----|------|------|-------|------|------|--------------------------------------------------------------------------------------------------------------------------------------------------------------|
| 1 | 1     | 156848918 | C   | T   | 0 1  |      | 0.441 |      | 4358 | VC=SNV;Func=exonic;Gene=NTRK1;ExonicFunc=missense;FullAA=NTRK1:NM_001123385.1;pathogenic;ClinVar_DIS= Familial_medullary_thyroid_carcinoma   Hereditary_inse |
| 2 | 14    | 81606214  | A   | G   | 0 1  |      | 0.238 |      | 4195 | VC=SNV;Func=splicing;Gene=TSHR;Transcript=NM_000369.2;NucleotideChange=                                                                                      |
| 3 | 16    | 89842176  | C   | G   | 0 1  |      | 0.196 |      | 3007 | VC=SNV;Func=exonic;Gene=FANCA;ExonicFunc=missense;FullAA=FANCA:NM_001123385.1                                                                                |
| 4 | 3     | 189455550 | T   | G   | 0 1  |      | 0.205 |      | 4929 | VC=SNV;Func=exonic;Gene=TP63;ExonicFunc=missense;FullAA=TP63:NM_001111111.1                                                                                  |
| 5 | 4     | 55129831  | C   | T   | 0 1  |      | 0.184 |      | 3848 | VC=SNV;Func=splicing;Gene=PDGFRA;Transcript=NM_006206.4;NucleotideChar                                                                                       |
| 6 | 7     | 140434574 | C   | CA  | 0 1  |      | 0.18  |      | 1314 | VC=INDEL;Func=splicing;Gene=BRAF;Transcript=NM_004333.4;NucleotideChan                                                                                       |
| 7 | X     | 39911657  | C   | A   | 0 1  |      | 0.298 |      | 1758 | VC=SNV;Func=splicing;Gene=BCOR;Transcript=NM_001123385.1;NucleotideChar                                                                                      |

Showing 1 to 7 of 7 entries

Previous  Next

*1592\_101, no cancerous mutations in clone; one heterozygous splicing change in DNTM3A. This variant is present at a frequency of 0.012 (43 / 3743) in the PBMC donor.*

Show  entriesSearch: 

|   | CHROM | POS      | REF | ALT | GT.x | GT.y | AF.x  | AF.y | DP.x |                                                                                                                                                |
|---|-------|----------|-----|-----|------|------|-------|------|------|------------------------------------------------------------------------------------------------------------------------------------------------|
| 1 | 2     | 25470029 | T   | C   | 0 1  |      | 0.499 |      | 5439 | VC=SNV;Func=splicing;Gene=DNMT3A;Transcript=NM_175629.2;NucleotideChar=2A>G;MutTaster=1.000;MutTaster_Pred=D;GERP+_RS=4.0;phyloP46way_placenta |

Showing 1 to 1 of 1 entries

Previous  Next

*1592\_122, no cancerous mutations in clone*

Show  entriesSearch: 

|                            | CHROM | POS | REF | ALT | GT.x | GT.y | AF.x | AF.y | DP.x | INFO.x |
|----------------------------|-------|-----|-----|-----|------|------|------|------|------|--------|
| No data available in table |       |     |     |     |      |      |      |      |      |        |

Showing 0 to 0 of 0 entries

Previous Next

*1592\_123, no cancerous mutations in clone*

Show  entriesSearch: 

|                            | CHROM | POS | REF | ALT | GT.x | GT.y | AF.x | AF.y | DP.x | INFO.x |
|----------------------------|-------|-----|-----|-----|------|------|------|------|------|--------|
| No data available in table |       |     |     |     |      |      |      |      |      |        |
