# Supplementary material
Source: PubMed Central journal article supplement (PMC8784963)
Supplement: NIHMS1770370-supplement-SuppleTable2_3.pdf [file NIHMS1770370-supplement-SuppleTable2_3.pdf]

Table S2 contd..

Showing 0 to 0 of 0 entries

Previous Next

*1620\_102, no cancerous mutations in clone; one variant with a one base pair deletion with 0.0261 frequency in the clone and 0.0268 frequency in the donor PBMC*

Show  entries

Search:

Code

| CHROM | POS | REF       | ALT | GT.x | GT.y | AF.x   | AF.y | DP.x | INFO.x                                                                                                                      |
|-------|-----|-----------|-----|------|------|--------|------|------|-----------------------------------------------------------------------------------------------------------------------------|
| 1     | 5   | 131931451 | TA  | T    | 0 1  | 0.0261 |      | 2945 | VC=INDEL;Func=exonic;Gene=RAD50;ExonicFunc=frame shift;FullAA=RAD50:NM_005732.3:exon13:c.2157delA:p.L719fs;Transcript=NM_00 |

Showing 1 to 1 of 1 entries

Previous  Next

*1620\_104, no cancerous mutations in clone*

Show  entries

Search:

Code

| CHROM                      | POS | REF | ALT | GT.x | GT.y | AF.x | AF.y | DP.x | INFO.x |
|----------------------------|-----|-----|-----|------|------|------|------|------|--------|
| No data available in table |     |     |     |      |      |      |      |      |        |

Showing 0 to 0 of 0 entries

Previous Next
