# Supplementary material
Source: PubMed Central journal article supplement (PMC8784963)
Supplement: NIHMS1770370-supplement-SuppleTable3.pdf [file NIHMS1770370-supplement-SuppleTable3.pdf]

**Table S3**

Detailed list of clinical-grade reagents used in iPSC generation and RPE differentiation

| Reagents                                                                                           | Vendor                     | Catalogue              | Use description                      |
|----------------------------------------------------------------------------------------------------|----------------------------|------------------------|--------------------------------------|
| Plasmid 149                                                                                        | Aldevron                   | p149                   | Reprogramming                        |
| Plasmid 150                                                                                        | Aldevron                   | p150                   | Reprogramming                        |
| ViCell concentration control<br>8X106 Beads/mL                                                     | Beckman Coulter            | B78897                 | Differentiation                      |
| CryoStor CS10                                                                                      | BioLife Solutions          | 210102                 | Ficoll/Reprogramming/Differentiation |
| TPO 50 ug                                                                                          | CellGenix                  | 1017-050               | Reprogramming                        |
| triCitrasol                                                                                        | Citra Labs                 | PN6030                 | Ficoll                               |
| Fetal Bovine Serum (U.S.),<br>Characterized                                                        | GE Healthcare<br>(Hyclone) | SH30071.03             | Differentiation                      |
| DNase I (PULMOZYME) (2 ug<br>in 2 mL)                                                              | Genentech                  | 50242-100-040<br>10039 | Reprogramming                        |
| Lymphocyte Separation Medium                                                                       | Lonza/corning              | 17-829E/25-<br>072-C1  | Ficoll                               |
| CD34 Nucleofactor® Solution                                                                        | Lonza                      | VPA-1003               | Reprogramming                        |
| CD34 Nucleofactor®<br>Supplement                                                                   | Lonza                      | VPA-1003               | Reprogramming                        |
| DPBS without Ca <sup>++</sup> and Mg <sup>++</sup>                                                 | Lonza/Life<br>Technology   | 17-<br>512F/14190250   | Ficoll/Reprogramming/Differentiation |
| Versene Solution                                                                                   | Thermo Fisher              | 15040-066              | Reprogramming/Differentiation        |
| Recombinant hLIF (10 ug/ml)                                                                        | Millipore                  | LIF1010                | Reprogramming                        |
| H-1152 (1 mg)                                                                                      | Millipore                  | 555550                 | Differentiation                      |
| CliniMACS® PBS/EDTA Buffer                                                                         | Miltenyi Biotec            | 700-25                 | Reprogramming                        |
| ClimiMACs CD34+ microbeads                                                                         | Miltenyi Biotec            | 171-01                 | Reprogramming                        |
| CliniMACS CD56 microbeads                                                                          | Miltenyi Biotec            | 130-019-401            | Differentiation                      |
| CliniMACS Anti-Biotin<br>microbeads                                                                | Miltenyi Biotec            | 130-019-201            | Differentiation                      |
| Mouse Anti-CD24 (Biotin<br>Conjugated)                                                             | Miltenyi Biotec            | Custom made            | Differentiation                      |
| DMSO                                                                                               | Mylan<br>Institutional     | 67457-178-10           | Reprogramming/Differentiation        |
| Flt-3 (50ug)                                                                                       | R&D Systems                | 308-GMP-050            | Reprogramming                        |
| SCF (50ug)                                                                                         | R&D Systems                | 255-GMP-050            | Reprogramming                        |
| IL-6 (50ug)                                                                                        | R&D Systems                | 206-GMP-050            | Reprogramming                        |
| IL-3 (50ug)                                                                                        | R&D Systems                | 203-GMP-050            | Reprogramming                        |
| Recombinant Human Activin A,<br>Animal-Free (60 ug, 645 ul /vial,<br>0.094 mg/ml) CUSTOM<br>VIALED | R&D Systems                | AFL 338                | Differentiation                      |
| Recombinant Human IGF-I,<br>Animal-Free (5.5 ug, 55 uL)-<br>CUSTOM VIALED                          | R&D Systems                | 291-GMP-<br>5.5ug      | Differentiation                      |
| PGE2 (10 mg)                                                                                       | R&D Systems                | 2296                   | Differentiation                      |

|                                               |                          |                  |                               |
|-----------------------------------------------|--------------------------|------------------|-------------------------------|
| SB431542 Hydrate (10 mg)                      | R&D Systems              | 1614             | Differentiation               |
| Blebbistatin (5 mg)                           | Sigma Aldrich            | B0560            | Differentiation               |
| Ascorbic Acid (2 g)                           | Sigma Aldrich            | PHR1008-2G       | Differentiation               |
| CKI-7 Dihydrochloride (5 mg)                  | Sigma Aldrich            | C0742-5mg        | Differentiation               |
| Niacinamide (1g)                              | Sigma Aldrich            | PHR1033-1G       | Differentiation               |
| Taurine (1g)                                  | Sigma Aldrich            | PHR1109-1G       | Differentiation               |
| Hydrocortisone (50 uM)                        | Sigma Aldrich            | H-6909           | Differentiation               |
| 3,3',5-Triiodo-L-thyronine sodium salt (1 mg) | Sigma Aldrich            | T5516            | Differentiation               |
| Y-27632 (1mg)                                 | Sigma Aldrich            | Y0503-1MG        | Reprogramming                 |
| Beta-Mercaptoethanol                          | Sigma Aldrich            | 07604            | Reprogramming                 |
| HA-100 (5 mg)                                 | StemCell Technologies    | 72482            | Reprogramming                 |
| StemSpan ACF                                  | StemCell Technologies    | 09805            | Reprogramming                 |
| CHIR99021 (2 mg)                              | Stemgent                 | 04-0004-02       | Reprogramming                 |
| A-83-01 (2 mg)                                | Stemgent                 | 04-0014          | Reprogramming                 |
| LDN-193189 (10 mg)                            | Stemgent                 | 04-0074-10       | Differentiation               |
| PD325901 (2mg)                                | Stemgent                 | 04-0006          | Differentiation               |
| Retronectin (2.5 mg)                          | Takara                   | T202             | Reprogramming                 |
| UltraPure 0.5M EDTA, pH 8                     | Thermo Fisher            | 15575-020        | Differentiation               |
| CTS N2 Supplement (100 X)                     | Thermo Fisher            | A13707-01        | Reprogramming/Differentiation |
| 100x Glutamax                                 | Thermo Fisher            | 35050-061        | Reprogramming                 |
| E8 Basal medium                               | Thermo Fisher            | A15169-01        | Reprogramming/Differentiation |
| E8 supplement                                 | Thermo Fisher            | A15170-01        | Reprogramming                 |
| CTS Vitronectin (VTN-N)                       | Thermo Fisher            | A27940           | Reprogramming/Differentiation |
| DMEM/F12, HEPES                               | Thermo Fisher            | 11330-032        | Reprogramming/Differentiation |
| MEM Alpha, nucleosides                        | Thermo Fisher            | 12571-063        | Differentiation               |
| MEM non-essential AA                          | Thermo Fisher            | 11140-050        | Differentiation               |
| Sodium Pyruvate (100 mM)                      | Thermo Fisher            | 11360-070        | Differentiation               |
| CTS KnockOut™ SR XenoFree                     | Thermo Fisher            | A1099201         | Differentiation               |
| B-27 Supplement 50 X, Serum free              | Thermo Fisher            | 17504-044        | Differentiation               |
| CTS TrypLE Select Enzyme                      | Thermo Fisher            | A12859-01        | Reprogramming/Differentiation |
| Water for injection (WFI)                     | APP Pharmaceuticals      | NDC-63323-185-10 | Reprogramming/Differentiation |
| CTS B-27 Supplement, XenoFree                 | Thermo Fisher            | A14867-01        | Reprogramming                 |
| Recombinant human FGF2 (0.1 mg/ml)            | Waisman Biomanufacturing | WC-FGF2-FP-003   | Reprogramming                 |
| 10 M NaOH                                     | Sigma Aldrich            | 72068            | Differentiation               |
| ViCell Reagent Pack                           | Beckman Coulter          | 383722           | Differentiation               |

Certificate of Analysis for all reagents have been validated for all these reagents for our clinical-grade manufacturing processes.
