# Supplementary material
Source: PubMed Central journal article supplement (PMC8784963)
Supplement: NIHMS1770370-supplement-SuppleTable4.pdf [file NIHMS1770370-supplement-SuppleTable4.pdf]

**Table S4: Summary of Body Weight Change in Rats Transplanted with iPSC-derived RPE**

| Days                 |      | Weekly body weight (grams) |      |      |      |      |      |      |      |      |      |
|----------------------|------|----------------------------|------|------|------|------|------|------|------|------|------|
|                      |      | 1                          | 8    | 15   | 22   | 29   | 36   | 43   | 50   | 57   | 64   |
| Vehicle control*     | Mean | 234                        | 234  | 254  | 272  | 283  | 290  | 295  | 304  | 309  | 316  |
|                      | SD   | 24.0                       | 26.1 | 26.2 | 24.5 | 28.7 | 25.1 | 27.0 | 27.3 | 30.8 | 30.6 |
| iPSC-RPE sheet*      | Mean | 233                        | 233  | 250  | 273  | 285  | 293  | 289  | 294  | 292  | 303  |
|                      | SD   | 19.6                       | 20.9 | 21.8 | 23.6 | 25.7 | 27.8 | 27.8 | 30.9 | 33.3 | 31.2 |
| iPSC-RPE suspension* | Mean | 270                        | 270  | 283  | 273  | 288  | 296  | 303  | 304  | 307  | 315  |
|                      | SD   | 29.0                       | 26.8 | 24.9 | 27.2 | 25.3 | 24.9 | 26.7 | 26.0 | 28.3 | 29.3 |

\*overall p-value ( $p > 0.1$ ) determined using ANOVA and Dunnett's test

**Summary of Daily Food Consumption in Rats Transplanted with iPSC-derived RPE**

| Days                 |      | Food consumption (grams/animal/day) |      |       |       |       |       |       |       |       |       |
|----------------------|------|-------------------------------------|------|-------|-------|-------|-------|-------|-------|-------|-------|
|                      |      | 1-8                                 | 8-15 | 15-22 | 22-29 | 29-36 | 36-43 | 43-50 | 50-57 | 57-64 | 64-71 |
| Vehicle control*     | Mean | 17                                  | 16   | 19    | 18    | 19    | 18    | 18    | 18    | 18    | 18    |
|                      | SD   | 0.7                                 | 1.5  | 2.1   | 1.3   | 1.2   | 1.7   | 1.8   | 1.0   | 1.3   | 1.2   |
| iPSC-RPE sheet*      | Mean | 16                                  | 17   | 20    | 19    | 19    | 17    | 18    | 17    | 18    | 19    |
|                      | SD   | 2.6                                 | 1.3  | 1.3   | 1.2   | 1.4   | 1.0   | 1.4   | 0.8   | 1.2   | 1.0   |
| iPSC-RPE suspension* | Mean | 17                                  | 17   | 19    | 18    | 18    | 17    | 17    | 18    | 18    | 17    |
|                      | SD   | 0.9                                 | 1.3  | 3.0   | 1.0   | 1.3   | 1.0   | 1.1   | 1.2   | 0.9   | 1.0   |

\*overall p-value ( $p > 0.1$ ) determined using ANOVA and Dunnett's test
