# Supplementary material
Source: PubMed Central journal article supplement (PMC8784963)
Supplement: NIHMS1770370-supplement-SuppleTable5.pdf [file NIHMS1770370-supplement-SuppleTable5.pdf]

**Table S4.** Lactic acid released by the PLGA scaffold during degradation. Days 1-35 are the in vitro stage of the scaffold and days 35 onwards are in vivo after transplantation. Grey highlights the days of PLGA scaffold bulk degradation phase (days 19-36). Note, the bulk degradation of the scaffold occurs in vitro.

|                                                                                 | <b>Samples</b>            | <b>mmol/L/scaffold/day</b> | <b>percent lactic acid released/scaffold/week</b> |
|---------------------------------------------------------------------------------|---------------------------|----------------------------|---------------------------------------------------|
| In vitro stage of iPSC-RPE-patch maturation                                     | 1-1 to 1-6 (days 1-6)     | 0.00047±0.00016            | 4.2%±1.7%                                         |
|                                                                                 | 2-1 to 2-6 (days 7-12)    | 0.00047±0.00016            | 4.2%±1.7%                                         |
|                                                                                 | 3-1 to 3-6 (days 13-18)   | 0.00047±0.00016            | 4.2%±1.7%                                         |
|                                                                                 | 4-1 to 4-6 (days 19-24)   | 0.00297±0.00056            | 31.9%±4.0%                                        |
|                                                                                 | 5-1 to 5-6 (days 25-30)   | 0.00273±0.00069            | 29.4%±7.5%                                        |
|                                                                                 | 6-1 to 6-6 (days 31-36)   | 0.00089±0.00048            | 9.6%±4.9%                                         |
| In vitro stage of iPSC-RPE-patch after transplantation in the sub-retinal space | 7-1 to 7-6 (days 37-42)   | 0.00047±0.00016            | 4.2%±1.7%                                         |
|                                                                                 | 8-1 to 8-6 (days 43-48)   | 0.00047±0.00016            | 4.2%±1.7%                                         |
|                                                                                 | 9-1 to 9-6 (days 48-54)   | 0.00047±0.00016            | 4.2%±1.7%                                         |
|                                                                                 | 10-1 to 10-6 (days 54-60) | 0.00047±0.00016            | 4.2%±1.7%                                         |
