# Supplementary material
Source: PubMed Central journal article supplement (PMC8784963)

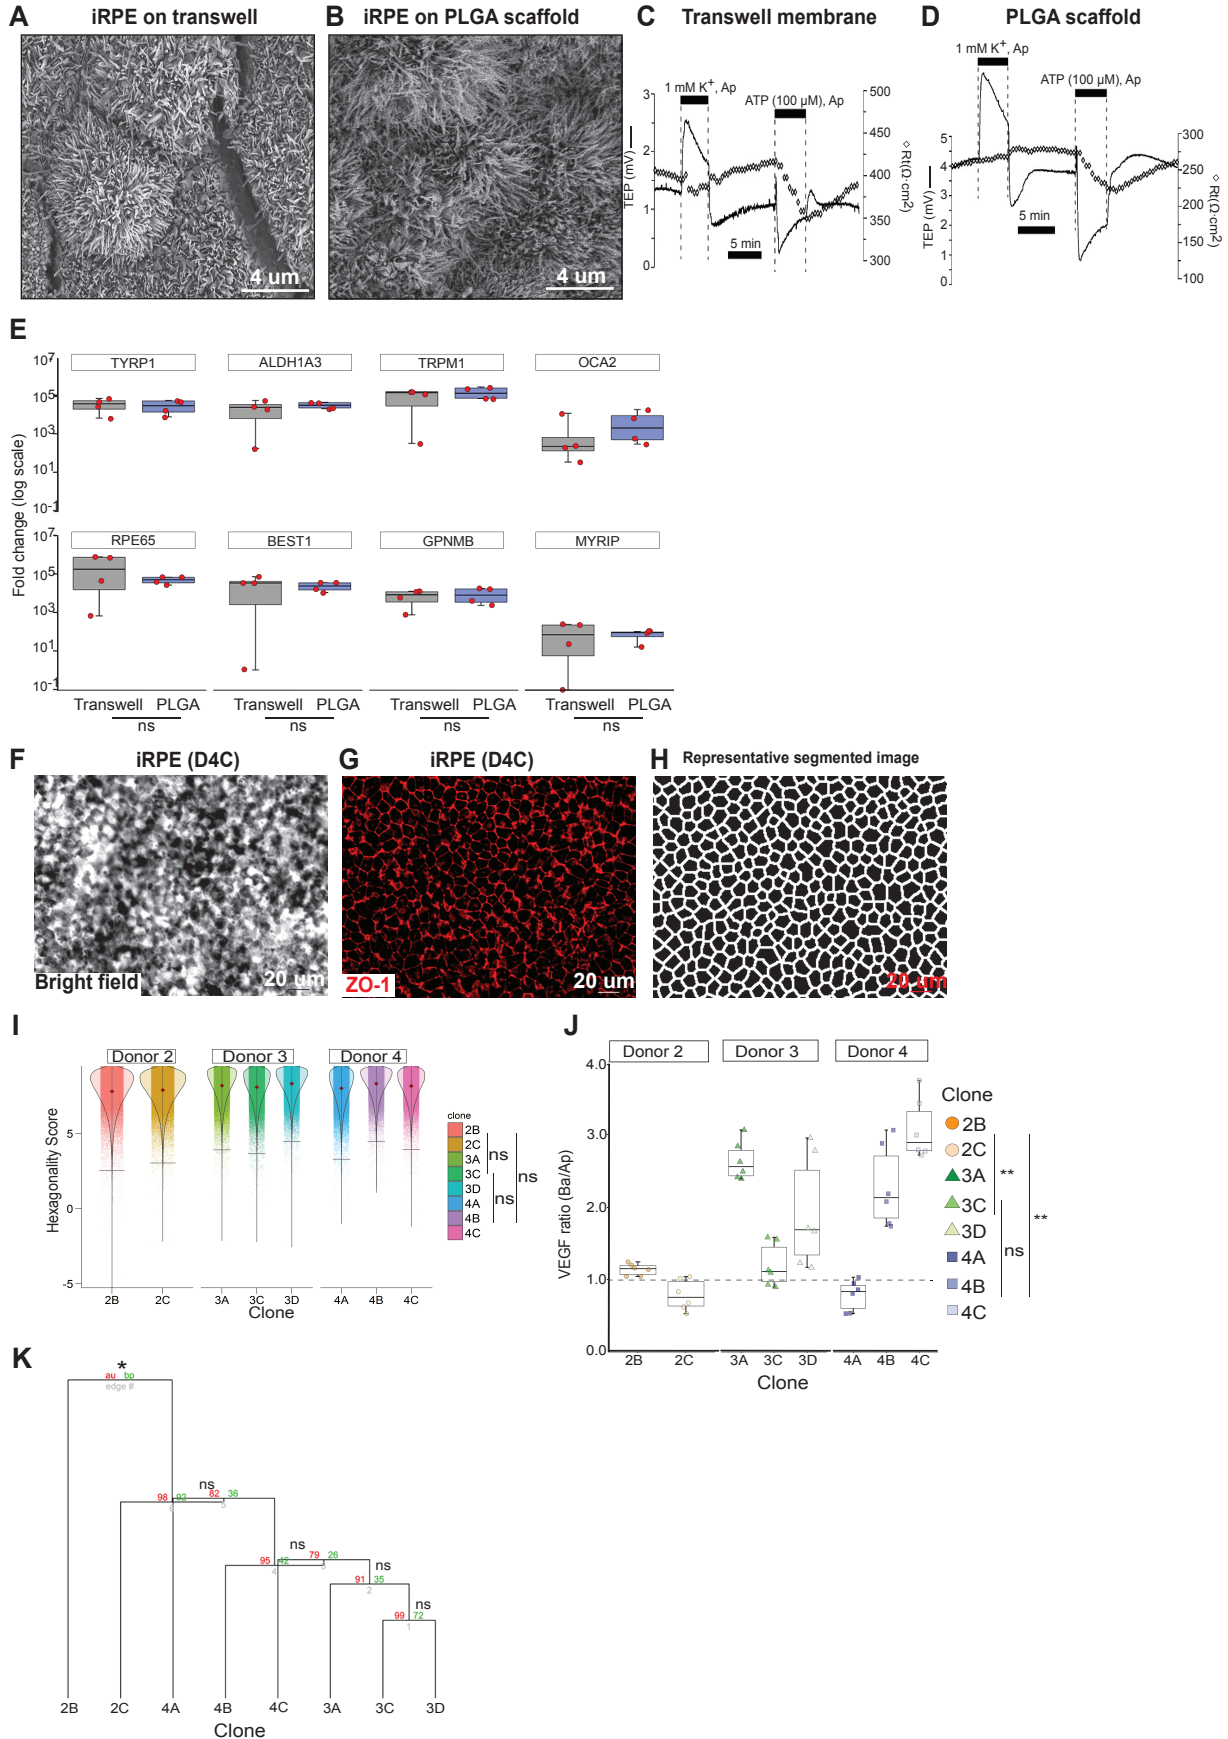

Supplement: NIHMS1770370-supplement-Supple_Fig3.pdf [file NIHMS1770370-supplement-Supple_Fig3.pdf]

Supplementary Figure 4

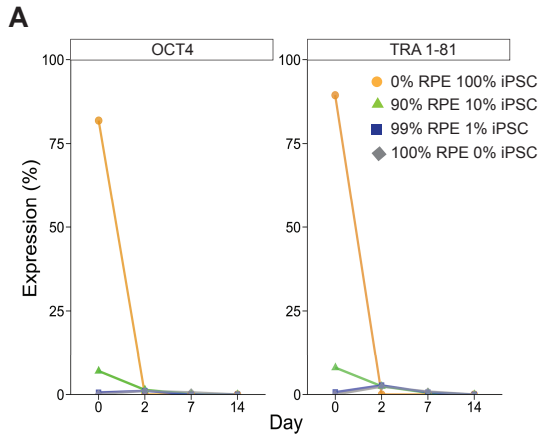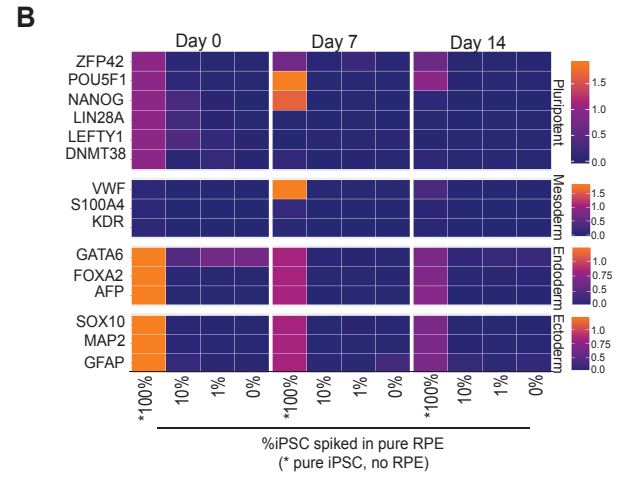

Supplement: NIHMS1770370-supplement-Supple_Fig4.pdf [file NIHMS1770370-supplement-Supple_Fig4.pdf]

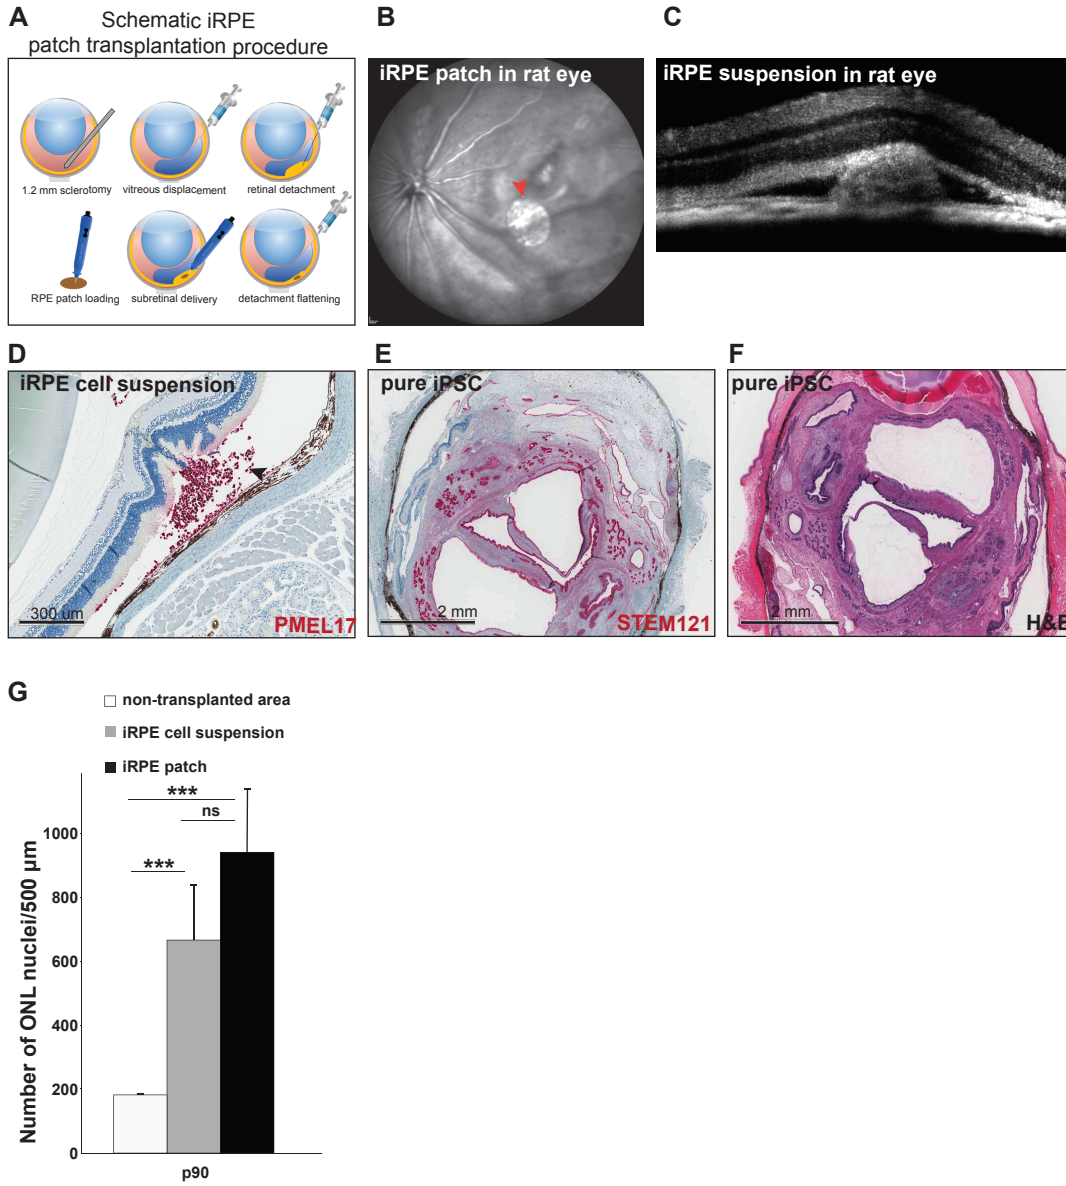

Supplement: NIHMS1770370-supplement-Supple_Fig5.pdf [file NIHMS1770370-supplement-Supple_Fig5.pdf]

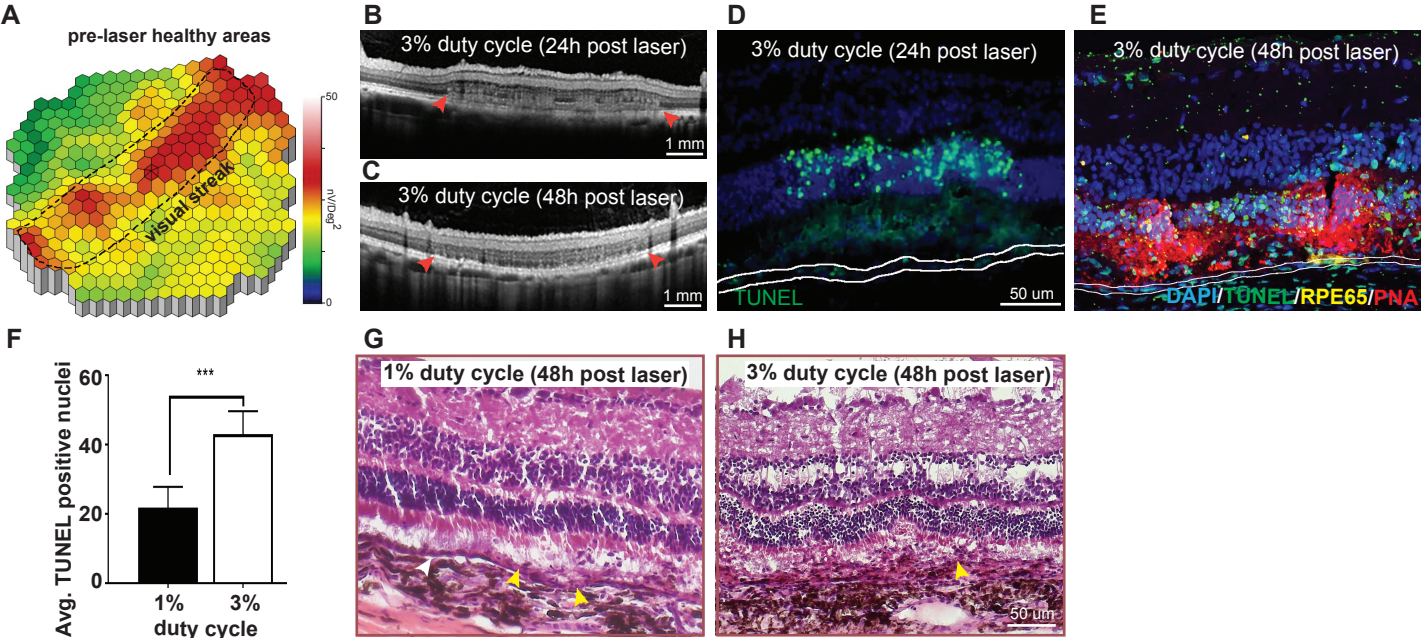

Supplement: NIHMS1770370-supplement-Supple_Fig6.pdf [file NIHMS1770370-supplement-Supple_Fig6.pdf]

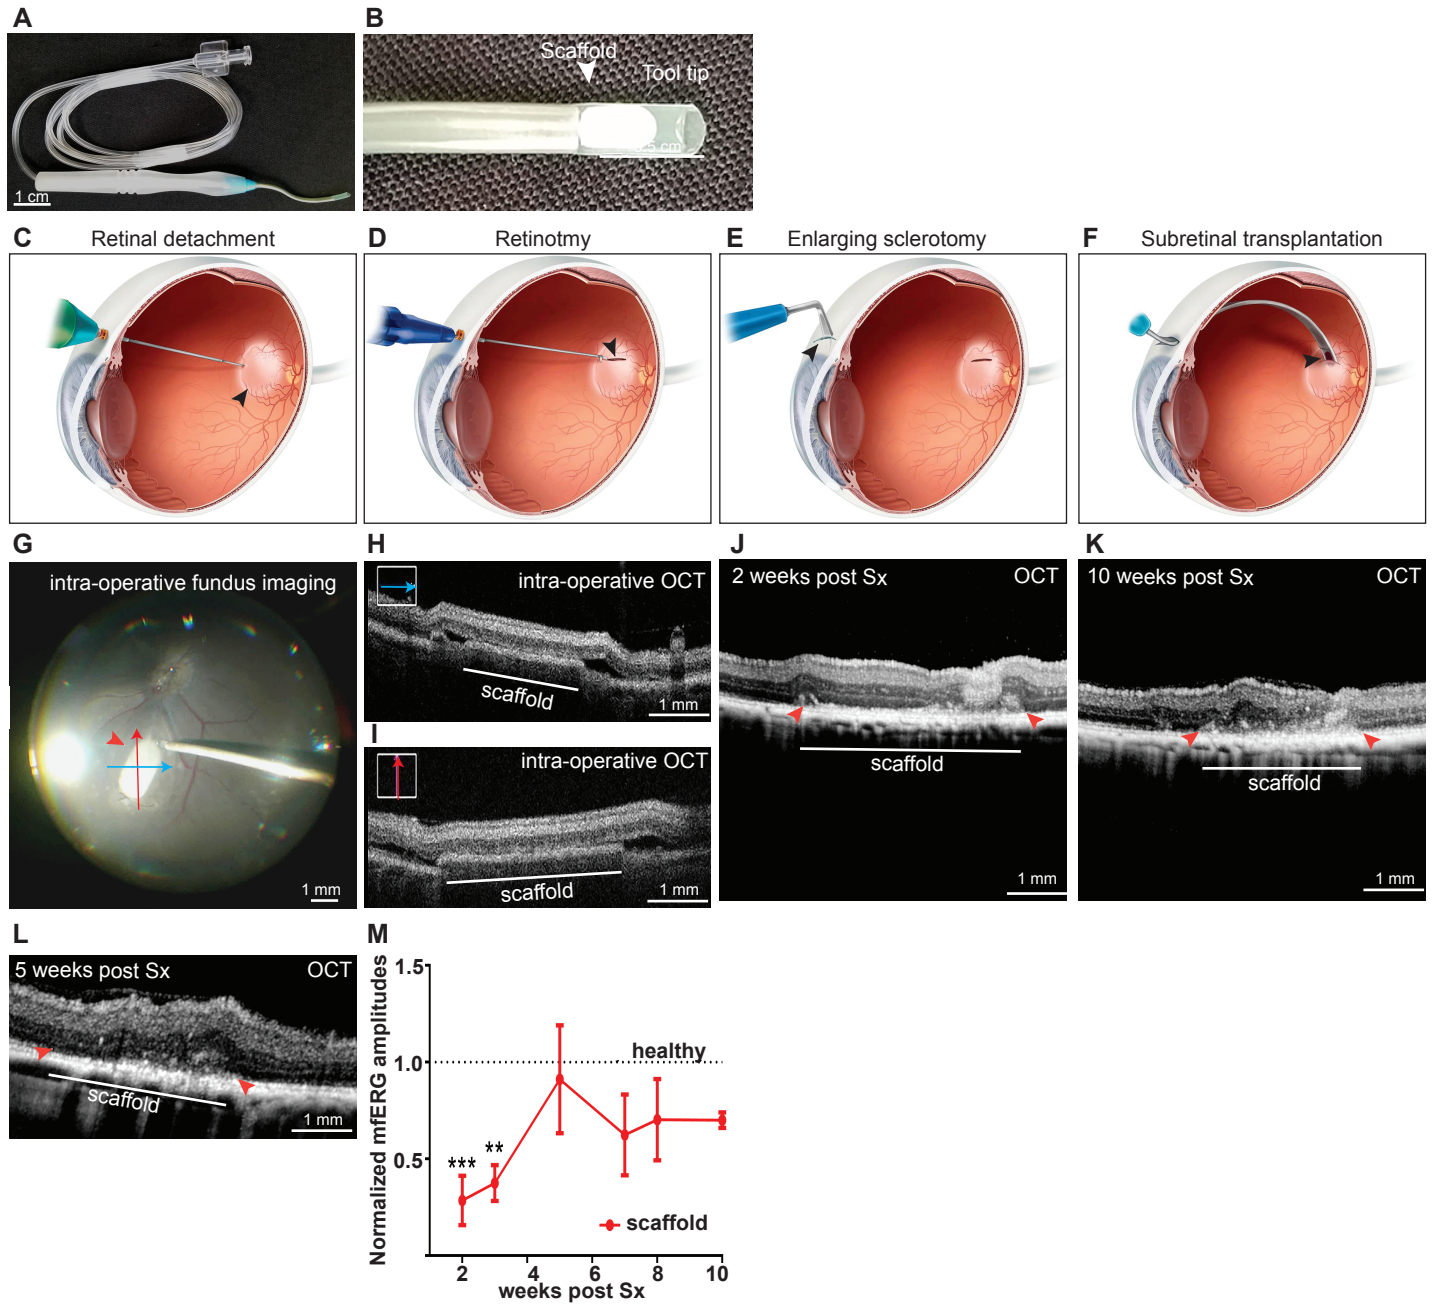

Supplement: NIHMS1770370-supplement-Supple_Fig7.pdf [file NIHMS1770370-supplement-Supple_Fig7.pdf]

Supplementary Figure 8

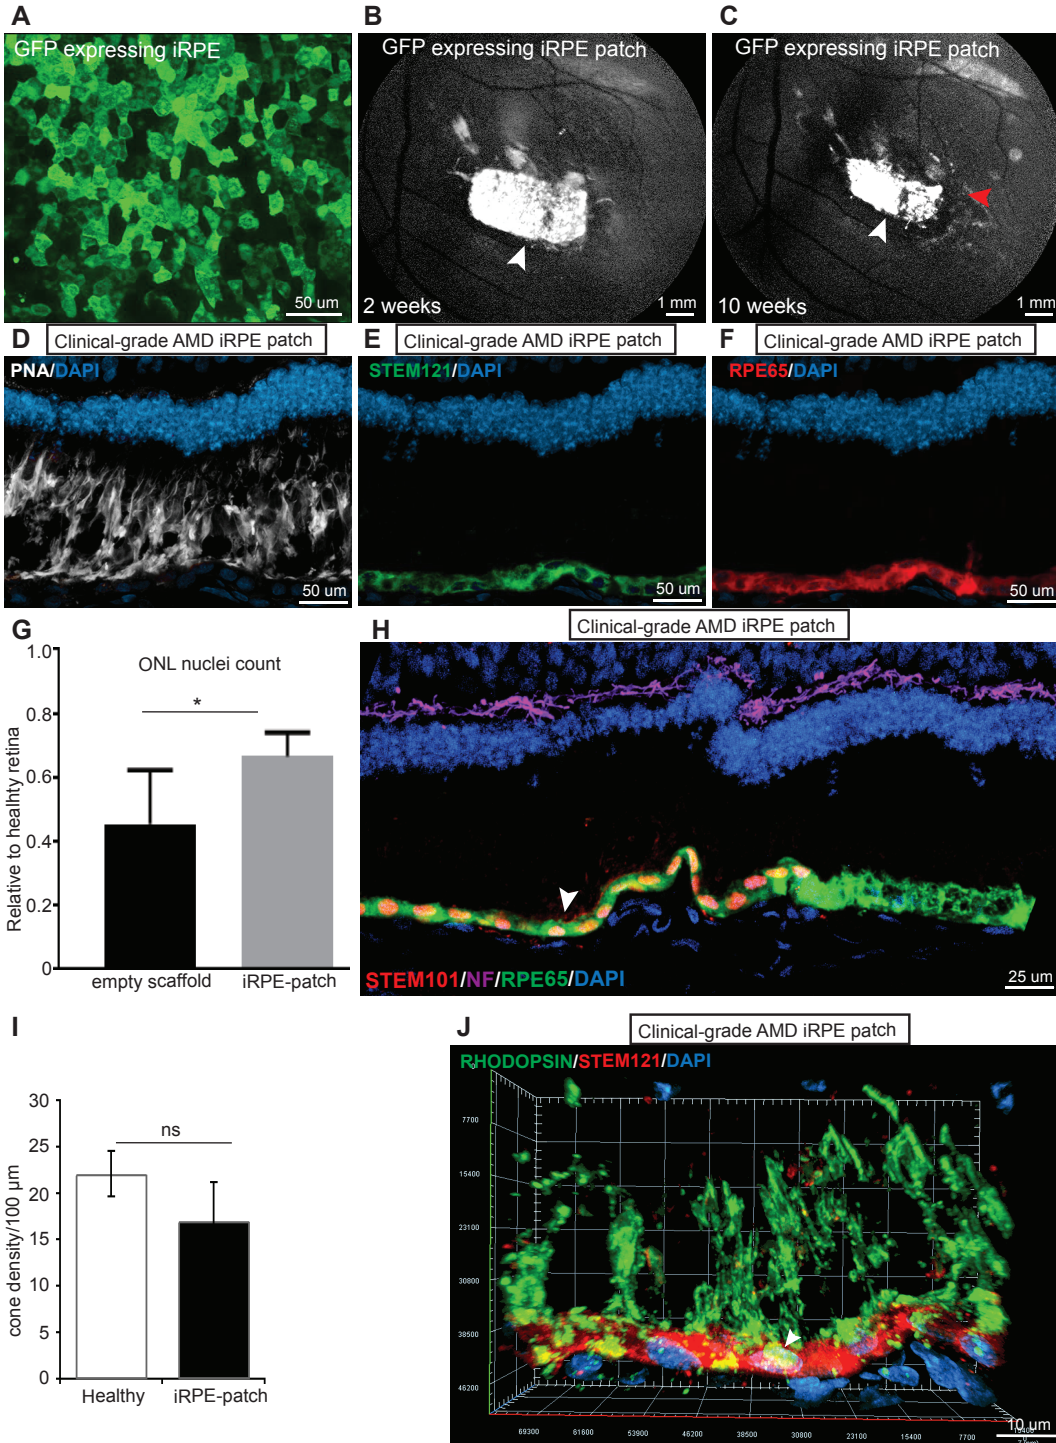

Supplement: NIHMS1770370-supplement-Supple_Fig8.pdf [file NIHMS1770370-supplement-Supple_Fig8.pdf]

Supplementary Figure 9

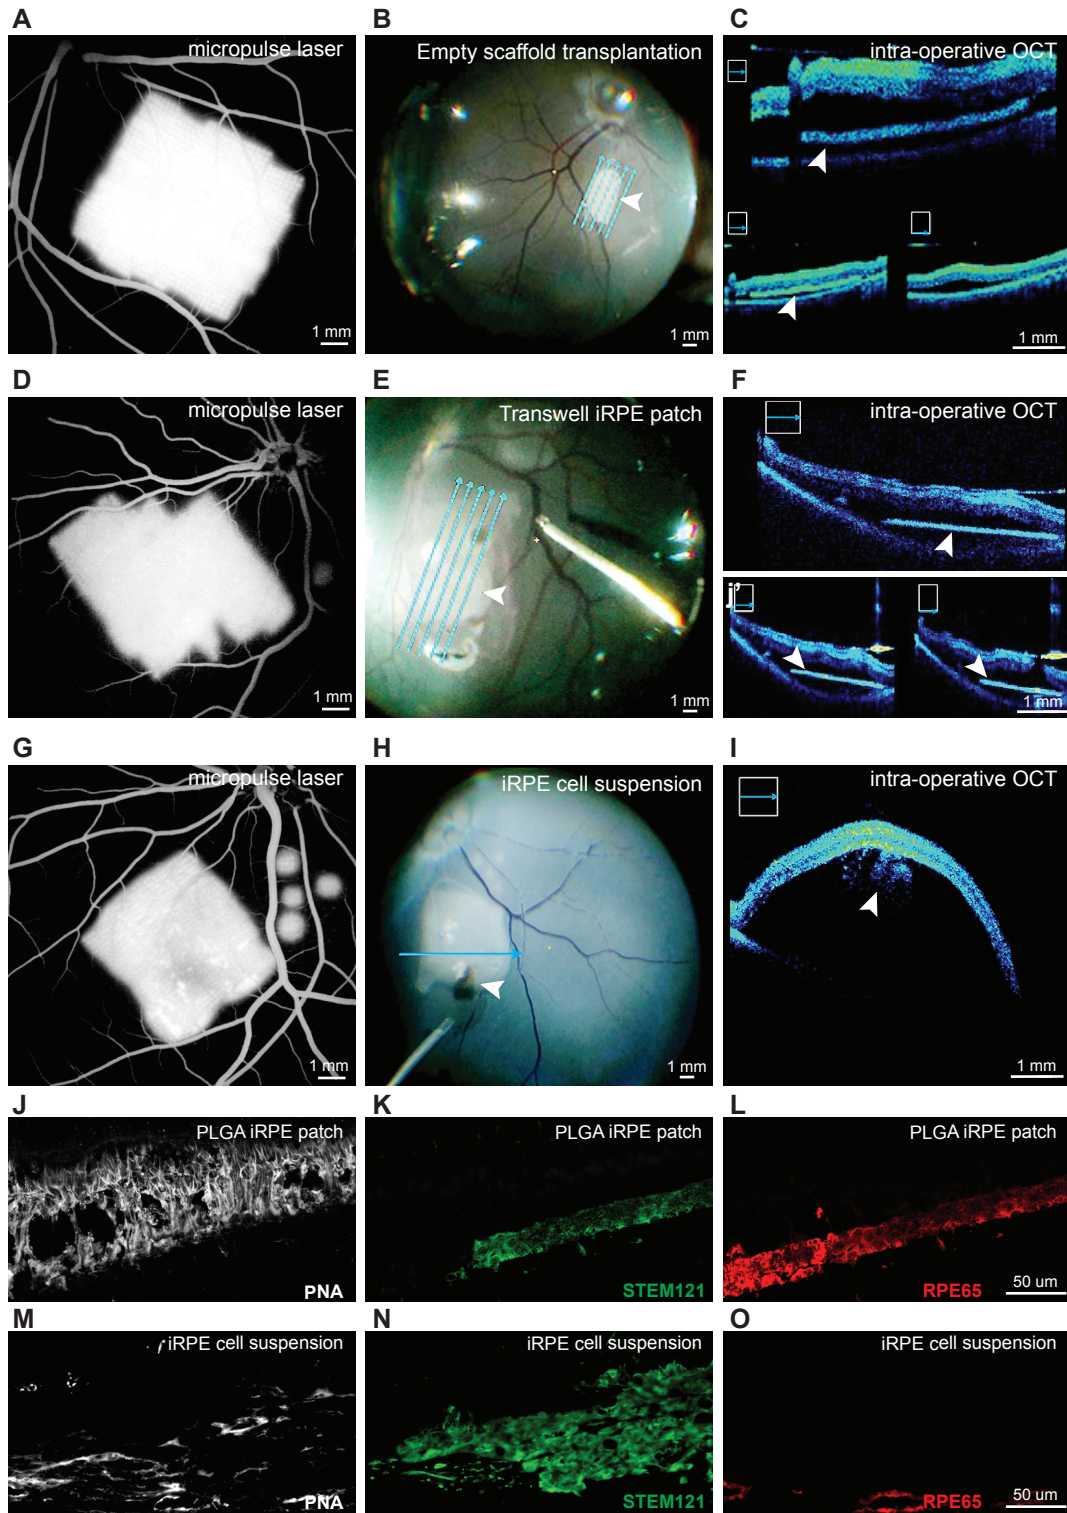

Supplement: NIHMS1770370-supplement-Supple_Fig9.pdf [file NIHMS1770370-supplement-Supple_Fig9.pdf]
